# Supplementary material
Source: publisher figshare collection journal article supplement (https://gsapubs.figshare.com/ndownloader/files/29051817)
Supplement: Supplementary file 1 [file 29051817]

## Sheet: Normalized Wt % 
			MgO	Na2O	Al2O3	SiO2	K2O	CaO	TiO2	MnO	FeO	Fe2O3	Total
			Wt % Normalized to 100%
			40.31	30.99	50.98	60.09	47.1	56.08	47.9	70.9374	71.85	79.85
			MgO	Na2O	Al2O3	SiO2	K2O	CaO	TiO2	MnO	FeO	Fe2O3	Total
2019_06	Vend3	Fossil	16.4673	0.135624	21.4278	35.2942	0.680069	0.821805	0.00370749	0.0859414	0	25.0835	100
2019_06	Vend2	Fossil	15.7914	0.127364	21.8544	35.6591	0.730538	0.722577	0.0448206	0.0981705	0	24.9717	100
2019_06	Vend1	Fossil	12.5456	0.161122	21.3923	37.505	0.74389	0.905308	0.0466175	0.0566554	0	26.6435	100
2019_07B	fibrous21_transv	Fossil	14.7544	0.0857564	21.3983	36.3996	0.13531	0.757007	0	0.101386	0	26.3683	100
2019_07B	fibrous20	Fossil	13.958	0	20.3927	33.4728	0.16763	0.809255	0.0698828	0.256528	0	30.8732	100
2019_07B	fibrous18	Fossil	12.4738	0	19.1789	32.4481	0.143944	0.819539	0.0536725	0.179782	0	34.7023	100
2019_07B	fibrous17	Fossil	10.1013	0	26.0402	43.1545	0.0763805	1.06358	0.0408213	0.136844	0	19.3864	100
2019_07B	fibrous16	Fossil	14.182	0	20.6196	32.931	0.0658726	0.796787	0.00825524	0.0727365	0	31.3237	100
2019_07B	fibrous15	Fossil	13.5429	0	19.9767	34.602	0.103714	1.22545	0.0511593	0.140998	0	30.357	100
2019_07B	fibrous14	Fossil	12.4128	0	18.9029	33.7907	0.108256	1.05692	0.11393	0.215356	0	33.3991	100
2019_07B	fibrous13	Fossil	12.8779	0	21.648	38.8288	0.11476	0.964161	0.0553444	0.195051	0	25.316	100
2019_07B	fibrous11	Fossil	12.2905	0	18.5411	31.2397	0.127066	0.633407	0.0410255	0.197706	0	36.9295	100
2019_07B	fibrous10	Fossil	12.9762	0	19.8032	33.4874	0.0746593	0.641253	0.0657403	0.205574	0	32.7459	100
2019_07B	fibrous9	Fossil	12.7094	0.0101991	19.619	32.9608	0.0229829	0.682975	0.0698488	0.217675	0	33.7071	100
2019_07B	fibrous7	Fossil	13.7244	0	20.3076	32.3884	0.0422203	0.493312	0.0479383	0.195833	0	32.8003	100
2019_07B	fibrous6	Fossil	12.2708	0.00485217	20.2873	34.7602	0.0745294	0.579697	0	0.20149	0	31.8212	100
2019_07B	fibrous5	Fossil	11.4764	0	22.1329	39.082	0.090633	0.932159	0.0749862	0.101934	0	26.1089	100
2019_07B	fibrous4	Fossil	13.4651	0	19.6246	32.7119	0.0244732	0.524332	0.051013	0.124723	0	33.4738	100
2019_07B	fibrous3	Fossil	11.7524	0.0096355	21.4823	36.6755	0.0623014	0.749279	0.0728967	0.0262528	0	29.1695	100
2019_07B	fibrous2	Fossil	13.5577	0	20.0964	34.0316	0.106687	0.597289	0.0779534	0.255507	0	31.2768	100
2019_07B	fibrous1	Fossil	12.232	0.00539447	22.0996	38.648	0.0262569	0.798414	0.0373814	0.145431	0	26.0076	100
2019_07B	vend_bloc2_fibrous7	Fossil	15.098	0.238171	21.7193	35.1106	0.619572	0.911588	0.0349138	0.0827608	0	26.1851	100
2019_07B	vend_bloc2_fibrous6	Fossil	15.3365	0.0495051	21.7724	34.1	0.380668	0.889953	0.00887385	0.125721	0	27.3364	100
2019_07B	vend_bloc2_fibrous5	Fossil	14.8144	0.0851818	22.0112	36.6674	0.180191	1.269	0	0.0771102	0	24.8954	100
2019_07B	vend_bloc2_fibrous4	Fossil	13.6315	0.0505511	21.2053	37.5887	0.326024	1.06645	0.0657918	0.118397	0	25.9473	100
2019_07B	vend_bloc2_fibrous3	Fossil	14.9015	0.146518	21.0953	32.9616	0.153762	0.973875	0.0428458	0.19127	0	29.5334	100
2019_07B	vend_bloc2_fibrous2	Fossil	13.3521	0.108578	20.2475	38.8559	0.155204	1.47707	0.042203	0.0666151	0	25.6948	100
2019_07B	vend_bloc2_fibrous1	Fossil	15.7423	0.0487551	21.8629	35.5002	0.338524	0.887077	0	0.123636	0	25.4966	100
2019_07B	vend_bloc2_fibrou-Mgpoor10	Fossil	3.34477	0.0723464	28.9317	59.4473	0.0974131	2.29393	0.00100669	0.0353433	0	5.7762	100
2019_07B	vend_bloc2_fibrou-Mgpoor9	Fossil	1.83405	0.0905246	32.5984	59.7038	0.139476	1.92057	0.0106797	0.0220586	0	3.68045	100
2019_07B	vend_bloc2_fibrou-Mgpoor8	Fossil	1.59116	0.0394217	32.8621	60.0404	0.139825	1.87623	0.0020876	0.0362254	0	3.41254	100
2019_07B	vend_bloc2_fibrou-Mgpoor7	Fossil	1.88163	0.0691653	30.771	59.5181	0.085357	2.10854	0	0	0	5.56622	100
2019_07B	vend_bloc2_fibrou-Mgpoor6	Fossil	4.35977	0.0836354	24.1184	57.6293	0.112616	2.5673	0	0	0	11.129	100
2019_07B	vend_bloc2_fibrou-Mgpoor5	Fossil	2.88802	0.11047	30.0113	57.9294	0.154367	2.22436	0	0.0513755	0	6.63069	100
2019_07B	vend_bloc2_fibrou-Mgpoor4	Fossil	3.03417	0.157191	26.1326	60.4153	0.104417	2.70798	0	0.00593869	0	7.44246	100
2019_07B	vend_bloc2_fibrou-Mgpoor3	Fossil	3.92007	0.0780575	25.7871	57.582	0.216931	2.38908	0.00693626	0.0331298	0	9.98677	100
2019_07B	vend_bloc2_fibrou-Mgpoor2	Fossil	3.25808	0.0871258	24.8318	58.5282	0.175351	2.70977	0.0108203	0	0	10.3989	100
2019_07B	vend_bloc2_fibrou-Mgpoor	Fossil	2.44665	0.0569003	29.2428	59.774	0.337763	2.25806	0.00550281	0.0165413	0	5.86179	100
2019_07B	P3_cx2-7_amorphous	Fossil	14.5371	0.479988	21.6253	33.235	0.107216	0.969694	0.0160165	0.120723	0	28.9089	100
2019_09B	Spectrum 23	Fossil Mg-poor	4.15978	0.127697	27.9123	58.6801	0.164906	1.26756	0.00854505	0.0927532	0	7.58633	100
2019_09B	Spectrum 24	Fossil Mg-poor	3.75422	0.132244	26.1034	61.1273	0.149342	1.15836	0.0258576	0	0	7.54931	100
2019_09B	Spectrum 25	Fossil Mg-poor	3.11717	0.0681556	30.4056	59.0229	0.142028	1.08248	0.0516055	0.0701937	0	6.03981	100
2019_09B	Spectrum 26	Fossil Mg-poor	3.94872	0.0955015	29.3797	58.4744	0.131813	1.19789	0.0307563	0	0	6.74128	100
2019_09B	Spectrum 27	Fossil Mg-poor	3.56735	0.133414	28.5753	60.4428	0.191627	1.14283	0.0422684	0.00905762	0	5.89535	100
2019_09B	Spectrum 28	Fossil Mg-poor	3.45145	0.0675993	29.8869	58.8615	0.163529	1.18813	0.0127887	0.0200719	0	6.348	100
2019_09B	Spectrum 29	Fossil Mg-poor	3.23115	0.11885	35.7894	56.1107	0.12861	0.723726	0	0.027783	0	3.86976	100
2019_09B	Spectrum 31	Fossil Mg-poor	4.59108	0.123441	32.5175	53.6917	0.178628	0.807573	0	0	0	8.09	100
2019_09B	Spectrum 32	Fossil Mg-poor	3.66282	0.129063	33.5581	55.7728	0.149267	0.707615	0.0252499	0.0526052	0	5.94248	100
2019_09B	Spectrum 1	Fossil Mg-rich	16.8127	0.0632886	21.0821	35.5957	0.27358	1.02444	0.0451638	0.129337	0	24.9737	100
2019_09B	Spectrum 2	Fossil Mg-rich	17.4045	0.123871	21.6249	35.6781	0.138539	0.880372	0	0.124501	0	24.0252	100
2019_09B	Spectrum 3	Fossil Mg-rich	15.5873	0.174317	21.4005	35.4223	0.311845	0.826116	0.0156482	0.139942	0	26.1221	100
2019_09B	Spectrum 4	Fossil Mg-rich	15.7621	0.166725	21.5023	35.6503	0.286209	0.878536	0	0.126632	0	25.6271	100
2019_09B	Spectrum 5	Fossil Mg-rich	15.7391	0.174226	22.3215	37.1254	0.260527	0.969495	0.0338613	0.0770951	0	23.2988	100
2019_09B	Spectrum 6	Fossil Mg-rich	16.4181	0.118356	21.6653	35.2961	0.284065	0.899441	0.00584957	0.10716	0	25.2057	100
2019_09B	Spectrum 7	Fossil Mg-rich	16.2505	0.148357	21.3473	35.8387	0.325352	0.975235	0.0369991	0.170368	0	24.9073	100
2019_09B	Spectrum 8	Fossil Mg-rich	15.9612	0.108306	21.5691	35.6602	0.413259	0.789372	0.0436832	0.103591	0	25.3513	100
2019_09B	Spectrum 9	Fossil Mg-rich	15.8883	0.100892	21.7537	35.8647	0.30575	0.885901	0.0787696	0.13977	0	24.9821	100
2019_09B	Spectrum 10	Fossil Mg-rich	16.048	0.181411	22.02	36.1411	0.276251	0.8357	0.0403519	0.0637286	0	24.3934	100
2019_09B	Spectrum 11	Fossil Mg-rich	15.3754	0.179482	23.1131	36.1875	0.312519	0.75532	0.055168	0.106071	0	23.9155	100
2019_09B	Spectrum 12	Fossil Mg-rich	16.2317	0.141396	21.7269	35.6758	0.337467	0.866356	0.0481639	0.0659729	0	24.9063	100
2019_09B	Spectrum 13	Fossil Mg-rich	15.5341	0.0790022	21.8421	33.7164	0.3912	0.604472	0.129466	0.127478	0	27.5758	100
2019_09B	Spectrum 14	Fossil Mg-rich	15.8519	0.0959587	21.5452	35.0023	0.381299	0.690045	0.0723057	0.138826	0	26.2222	100
2019_09B	Spectrum 15	Fossil Mg-rich	16.0829	0.139912	21.4644	35.1803	0.39665	0.818185	0.0314865	0.15686	0	25.7293	100
2019_09B	Spectrum 16	Fossil Mg-rich	16.3335	0.15105	21.1394	35.1881	0.315703	0.983388	0.050348	0.0657304	0	25.7727	100
2019_09B	Spectrum 17	Fossil Mg-rich	15.8444	0.124184	22.1345	33.4371	0.229535	0.683007	0	0.130285	0	27.417	100
2019_09B	Spectrum 18	Fossil Mg-rich	16.2739	0.116398	21.6479	34.944	0.360408	0.911534	0	0.0802828	0	25.6656	100
2019_09B	Spectrum 19	Fossil Mg-rich	15.5672	0.109727	21.8164	34.6441	0.365732	0.755693	0.0406411	0.11072	0	26.5898	100
2019_09B	Spectrum 20	Fossil Mg-rich	15.5044	0.0985403	21.7922	36.3218	0.327752	0.865622	0.0175001	0.150744	0	24.9214	100
2019_09B	Spectrum 21	Fossil Mg-rich	16.9403	0.141088	21.6051	35.5282	0.221297	0.907032	0.0237588	0.102101	0	24.5312	100
2019_09B	Spectrum 22	Fossil Mg-rich	15.0411	0.0815644	22.1469	36.1265	0.394525	0.811698	0.012828	0.106132	0	25.2788	100
2019_09B	Spectrum 71	Rock Mg-rich clay	16.0437	0.0487725	21.5416	38.2606	0.635106	0.280444	0.0378179	0.0919492	0	23.06	100
2019_09B	Spectrum 72	Rock Mg-rich clay	15.1999	0.0791045	21.7659	40.3466	0.817026	0.254424	0.0481379	0.0824281	0	21.4064	100
2019_09B	Spectrum 73	Rock Mg-rich clay	13.064	0.080165	24.0183	41.1523	1.74882	0.238306	0.0249555	0.0683844	0	19.6047	100
2019_09B	Spectrum 74	Rock Mg-rich clay	16.267	0.102025	21.6207	38.3833	1.01577	0.226805	0.0136583	0.159564	0	22.2111	100
2019_09B	Spectrum 75	Rock Mg-rich clay	17.0072	0.109379	21.3558	38.1945	0.908648	0.288681	0.00997748	0.159366	0	21.9665	100
2019_06	Vend_Rock3	Rock matrix	2.70763	0.109792	19.6072	67.9145	5.72548	0.297388	0.290912	0.00609352	0	3.34106	100
2019_06	Vend_Rock2	Rock matrix	2.43847	0.333523	29.7716	56.0439	7.89304	0.302396	0.123012	0.0448536	0	3.04926	100
2019_07B	vend_bloc1_rock_amorphous	Rock matrix fine clay	1.54381	0.226812	23.7311	66.1601	5.57755	0.287577	0.233735	0.0829565	0	2.15634	100
2019_09	v_matrix2	Rock matrix	3.3543	0.135249	22.2793	64.1015	6.30942	0.248815	0.484291	0.0260616	0	3.06103	100
2019_09	v_matrix3	Rock matrix	1.82238	0.186899	30.7748	58.3432	5.40076	0.374367	0.265324	0	0	2.83226	100
2019_09	v_matrix4	Rock matrix	3.06105	0.148066	24.575	61.7456	5.53035	0.608565	0.407591	0	0	3.92378	100
2019_09	v_matrix5	Rock matrix	4.21711	0.137383	27.1741	60.2111	4.12911	0.836588	0.160218	0.0646857	0	3.06973	100
2019_09	v_matrix6	Rock matrix	2.53848	0.111614	21.818	65.5877	4.76315	0.524813	0.842441	0	0	3.81382	100
2019_09	v_matrix7	Rock matrix	4.67264	0.124087	28.1289	51.5456	7.73521	0.366867	0.415179	0.0855362	0	6.92597	100
2019_09	v_matrix8	Rock matrix	1.87637	0.195411	35.8365	53.9649	5.32798	0.265607	0.211606	0	0	2.32158	100
2019_09	v_matrix9	Rock matrix	5.00453	0.0569354	27.349	53.5132	8.12672	0.269674	0.298082	0	0	5.38181	100
2019_09	v_matrix10	Rock matrix	5.25916	0.0664194	23.4678	55.6601	6.90154	0.400884	0.981705	0.129751	0	7.1327	100
2019_09	v_matrix11	Rock matrix	2.48003	0.103745	22.2811	65.3402	5.53162	0.457679	0.238348	0	0	3.56726	100
2019_09	v_matrix12	Rock matrix	6.10074	0.103902	24.9376	53.976	5.66121	0.83838	0.955144	0.106593	0	7.32046	100
2019_09	v_matrix13	Rock matrix	4.63141	0.18931	24.8447	56.3237	6.13415	0.600582	0.525012	0.121746	0	6.6294	100
2019_09	v_matrix14	Rock matrix	2.57946	0	16.5903	74.2564	3.51698	0.360104	0.24986	0.071394	0	2.3755	100
2019_09	v_matrix16	Rock matrix	3.83095	0.0669493	26.4492	56.6391	7.60967	0.477323	0.515654	0	0	4.41112	100
2019_09	v_matrix18	Rock matrix	1.73297	0.052002	8.24735	84.8651	2.17371	0.0948525	0.306196	0	0	2.5278	100
2019_09	v_matrix19	Rock matrix	4.82858	0.0505762	24.5667	55.1182	7.52416	0.201323	0.153343	0.0564615	0	7.50065	100
2019_09	v_matrix20	Rock matrix	1.92479	0.0547396	18.6785	68.1605	7.05151	0.118253	0.358248	0.181502	0	3.47196	100
2019_09B	Spectrum 81	Rock matrix sme	2.77509	0.131567	27.8485	65.5874	0.438028	0.622581	0.108726	0.00961334	0	2.47854	100
2019_09B	Spectrum 82	Rock matrix sme	2.75303	0.0776192	28.436	65.0676	0.882322	0.467563	0.204378	0.0218117	0	2.08969	100
2019_09B	Spectrum 83	Rock matrix sme	2.6928	0.0897737	29.2766	62.6653	2.34973	0.41229	0.03864	0.0567917	0	2.41813	100
2019_09B	Spectrum 1	Rock matrix sme	3.09288	0.0983309	27.4529	65.4893	0.132438	0.673252	0.0670059	0.0838622	0	2.91002	100
2019_09B	Spectrum 2	Rock matrix sme	2.95078	0.075732	27.0593	66.6279	0.179817	0.588572	0.0686229	0.0696652	0	2.37961	100
2019_09B	Spectrum 3	Rock matrix sme	2.79238	0.0839978	30.8397	63.4703	0.291776	0.533161	0.0665696	0	0	1.92207	100
2019_09B	Spectrum 4	Rock matrix sme	3.13194	0.102324	27.1452	66.8542	0.252527	0.579667	0	0	0	1.93414	100
2019_09B	Spectrum 5	Rock matrix sme	3.14243	0.112377	26.9143	66.1642	0.754882	0.677939	0.0323954	0	0	2.20149	100
2019_09B	Spectrum 7	Rock matrix sme	2.86547	0.0887575	27.1955	66.4823	0.100571	0.53411	0.113185	0	0	2.62011	100
2019_09B	Spectrum 8	Rock matrix sme	2.87955	0.0428139	27.6591	66.6207	0.0750215	0.631068	0.037234	0	0	2.05447	100
2019_09B	Spectrum 9	Rock matrix sme	3.08312	0.0784397	27.3489	66.7928	0.0586753	0.611075	0	0	0	2.02703	100
2019_09B	Spectrum 10	Rock matrix sme	3.20973	0.112358	27.567	66.2241	0.224805	0.618028	0	0.0389362	0	2.005	100
2019_09B	Spectrum 11	Rock matrix sme	2.97244	0.087394	27.2519	66.8631	0.255799	0.641128	0	0	0	1.92825	100
2019_09B	Spectrum 12	Rock matrix sme	2.63226	0.17296	26.5775	62.4637	0.812578	1.03631	0	0	0	6.30468	100
2019_09B	Spectrum 13	Rock matrix sme	2.89964	0.150766	28.4628	65.667	0.188269	0.683863	0.0638234	0	0	1.88382	100
2019_09B	Spectrum 14	Rock matrix sme	2.47228	0.0917074	26.3696	63.7481	0.58164	0.93077	0	0	0	5.80598	100
2019_09B	Spectrum 15	Rock matrix sme	2.77117	0.0534578	27.2339	66.676	0.13898	0.60835	0.0427281	0	0	2.47544	100
2019_09B	Spectrum 16	Rock matrix sme	2.57355	0.0815074	28.7021	64.5288	0.130165	1.49276	0.0636539	0.0642611	0	2.36312	100
2019_09B	Spectrum 17	Rock matrix sme	3.06509	0.0440265	27.1905	66.3512	0.083681	0.750151	0.0282601	0.0100403	0	2.47707	100
2019_09	v_matrix_esc1	Rock matrix sme?	2.88816	0.138528	26.8221	65.9336	0.532128	0.965432	0.0102944	0	0	2.70973	100
2019_09	v_matrix_esc2	Rock matrix sme?	2.3787	0.219559	25.2729	62.1526	3.97496	0.974937	0.133273	0.026863	0	4.8662	100
2019_09	v_matrix_esc6	Rock matrix sme?	2.9752	0.118991	28.4541	65.6865	0.129236	0.720632	0.0457215	0	0	1.86963	100
2019_09	v_matrix_esc7	Rock matrix sme?	2.28721	0.171522	27.1565	64.7115	0.599283	1.72392	0.0652342	0.0681464	0	3.2167	100
2019_09	v_matrix_esc8	Rock matrix sme?	2.83592	0.071101	25.8117	66.6578	0.557529	0.995363	0.04666	0	0	3.02393	100
2019_09	v_matrix_esc9	Rock matrix sme?	3.39959	0.11955	25.9043	66.7912	0.326732	0.964399	0	0	0	2.49418	100
2019_07B	vend_bloc1_rock_filo	Rock mica	2.61865	0.0659647	27.1878	56.3734	7.44926	0.653027	0.174658	0	0	5.47719	100
2019_07B	vend_bloc2_mica_Mg2	Rock mica	15.5213	0.130796	18.9976	41.8453	1.3565	1.55292	0.948259	0.0125618	0	19.6348	100
2019_07B	vend_bloc2_mica1	Rock mica	0.803764	1.24616	35.8623	49.7729	8.45091	0.031889	0.27751	0	0	3.5546	100
2019_09	Mica1	Rock mica	12.0133	0.0359853	21.3204	34.5282	1.65925	0.389967	0.105936	0.262261	0	29.6848	100
2019_09	Mica3	Rock mica	0.153658	0.115199	43.821	54.2972	0.826866	0.262602	0.128966	0	0	0.394548	100
2019_09	Mica4	Rock mica	13.1812	0.070519	21.6685	39.2533	1.33274	0.508505	0.175626	0.215345	0	23.5942	100
2019_09	Mica5	Rock mica	1.78442	0.248736	32.5824	51.7473	9.06645	0.0592626	0.454241	0	0	4.05714	100
2019_09	Mica6	Rock mica	15.0754	0.0591863	20.9713	41.0512	1.7398	0.501922	0.657198	0.16807	0	19.7759	100
2019_09	Mica8	Rock mica	0.740291	0.149864	38.8298	54.8587	3.17554	0.169981	0.0227515	0	0	2.05312	100
2019_09	Mica9	Rock mica	0.404269	0.170496	41.3254	55.7265	0.919493	0.268671	0.0256662	0.018432	0	1.14108	100
2019_09	Mica10	Rock mica	0.668605	0.100614	38.6194	55.9229	2.26152	0.580265	0.0920673	0.0151921	0	1.73952	100
2019_09	Mica11	Rock mica	0.350295	0.303666	39.5968	51.0456	7.34172	0.129431	0.0270194	0.0348573	0	1.17057	100
2019_09	Mica12	Rock mica	0.320693	0.158513	41.8999	55.9567	0.175134	0.592695	0.028806	0	0	0.867471	100
2019_09	Mica13	Rock mica	0.273552	0.509509	41.3231	53.7269	2.69137	0.257064	0.26784	0.032201	0	0.918461	100
2019_09	Mica14	Rock mica	3.93929	0.255169	32.8305	47.2859	8.36703	0.279286	0.303456	0.00427403	0	6.73507	100
2019_09	Mica15	Rock mica	0.293349	0.172705	41.1263	53.9527	2.73695	0.302023	0.0637914	0	0	1.3522	100
2019_09	Mica16	Rock mica	12.147	0.151523	24.3491	39.6561	3.30697	0.465815	0.179565	0.155922	0	19.5881	100
2019_09	Mica17	Rock mica	0.179121	0.340372	41.7592	53.2697	2.97096	0.346071	0.159976	0.107428	0	0.867145	100
2019_09	Mica20	Rock mica	2.11493	0.309425	31.9072	53.2937	8.81078	0.109049	0.300471	0.00426798	0	3.15019	100
2019_09B	Spectrum 42	Rock mica musc-like	3.287	0.069247	25.9247	57.0315	7.45951	0.115853	0.166965	0.0416191	0	5.90365	100
2019_09B	Spectrum 43	Rock mica musc-like	3.35119	0.144403	26.5159	54.6657	7.95027	0.143039	0.216936	0.00818765	0	7.0044	100
2019_09B	Spectrum 44	Rock mica musc-like	3.13995	0.151469	26.3302	54.9333	7.89163	0.0643083	0.321322	0.0272095	0	7.14054	100
2019_09B	Spectrum 45	Rock mica musc-like	3.17223	0.0752523	26.0812	54.8456	7.87945	0.224345	0.209703	0.00107005	0	7.51115	100
2019_09B	Spectrum 46	Rock mica musc-like	3.38032	0.0619182	26.5396	54.9628	8.01956	0.122418	0.209047	0.0500451	0	6.65425	100
2019_09B	Spectrum 47	Rock mica musc-like	3.18474	0.0975664	26.4384	54.9281	8.52694	0.0978288	0.215937	0	0	6.51045	100
2019_09B	Spectrum 48	Rock mica musc-like	3.44857	0.0366308	26.6745	55.572	8.03758	0.124553	0.15909	0.0532631	0	5.89378	100
2019_09B	Spectrum 49	Rock mica musc-like	3.15675	0.213624	26.8141	56.1853	7.83324	0.126308	0.130007	0.058416	0	5.48223	100
2019_09B	Spectrum 50	Rock mica musc-like	3.13271	0.0549325	27.0356	55.3361	8.21325	0.113352	0.155954	0.00261757	0	5.95548	100
2019_09B	Spectrum 51	Rock mica musc-like	3.54013	0.0629976	26.8249	55.1895	7.95628	0.257071	0.156859	0.0249204	0	5.98738	100
2019_09B	Spectrum 52	Rock mica musc-like	3.09028	0.0362198	26.6225	54.7141	8.08559	0.149363	0.587572	0	0	6.71432	100
2019_09B	Spectrum 53	Rock mica musc-like	3.29139	0.174946	26.4675	54.9029	7.86671	0.101285	0.187469	0.019912	0	6.98781	100
2019_09B	Spectrum 54	Rock mica musc-like	3.41656	0.17665	26.5894	55.0764	7.82321	0.0906422	0.157827	0.0126289	0	6.65666	100
2019_09B	Spectrum 55	Rock mica musc-like	3.4189	0.0770552	26.1641	54.9809	8.96783	0.172141	0.24303	0	0	5.9761	100
2019_09B	Spectrum 56	Rock mica musc-like	3.16101	0.0748025	24.4694	58.5559	7.5117	0.0829604	0.260643	0	0	5.88355	100
2019_09B	Spectrum 57	Rock mica musc-like	3.69597	0.138164	26.6522	55.5831	10.3165	0.031914	0.306137	0	0	3.27603	100
2019_09B	Spectrum 58	Rock mica musc-like	3.52772	0.0740322	27.6813	55.8549	10.0843	0.0709819	0.257631	0.072705	0	2.37643	100
2019_09B	Spectrum 59	Rock mica musc-like	3.78808	0.10192	28.3965	53.7939	10.8055	0.0142698	0.20693	0.0999016	0	2.79307	100
2019_09B	Spectrum 60	Rock mica musc-like	3.94091	0.0589995	28.0063	54.0586	10.5087	0.0396961	0.271454	0	0	3.11542	100
2019_09B	Spectrum 61	Rock mica musc-like	3.87726	0.127495	27.5116	54.8866	10.53	0.0521973	0.163026	0	0	2.85184	100
2019_09B	Spectrum 62	Rock mica musc-like	4.53532	0.0934607	27.8137	54.1671	9.67506	0.0763101	0.273182	0.0787095	0	3.28719	100
2019_09B	Spectrum 63	Rock mica musc-like	4.07077	0.0723358	27.7204	54.9473	10.1378	0.0966675	0.144178	0	0	2.81059	100
2019_09B	Spectrum 64	Rock mica musc-like	3.77587	0.0706243	27.9287	55.5878	9.81212	0.0839845	0.117873	0.116386	0	2.50663	100
2019_09B	Spectrum 65	Rock mica musc-like	3.11076	0.0513532	29.7257	55.941	8.26025	0.138334	0.22146	0.0369761	0	2.51415	100
2019_09B	Spectrum 66	Rock mica musc-like	4.0604	0.0331928	28.3741	53.786	10.5866	0.0530429	0.237205	0.0095846	0	2.85976	100
2019_09B	Spectrum 67	Rock mica musc-like	3.62668	0.0638229	25.1688	58.5597	9.46925	0.0552978	0.202619	0.0387173	0	2.81521	100
2019_09B	Spectrum 68	Rock mica musc-like	3.58505	0.0321214	25.6881	57.7332	9.59441	0.0640472	0.270369	0.0350004	0	2.99776	100
2019_09B	Spectrum 69	Rock mica musc-like	3.98613	0.117262	28.1519	53.9785	10.3159	0.0619339	0.259088	0.0864057	0	3.04288	100
2019_09B	Spectrum 70	Rock mica musc-like	3.58189	0.057312	25.4972	59.4263	8.32098	0.111736	0.124198	0.0694312	0	2.81095	100
2019_09B	Spectrum 76	Rock Mg-rich	22.5702	0.0768801	26.0289	33.5969	0.235115	0.117912	0.101467	0.221233	0	17.0513	100
2019_09B	Spectrum 77	Rock Mg-rich	23.1115	0.0702077	25.7316	32.7231	0.0950228	0.0689143	0.0441763	0.296605	0	17.8588	100
2019_09B	Spectrum 78	Rock Mg-rich	21.8782	0.0603609	25.2901	34.644	0.144218	0.155187	0.121316	0.33851	0	17.3681	100
2019_09B	Spectrum 79	Rock Mg-rich	21.1091	0.0695328	25.1211	34.1243	0.803501	0.093266	0.150366	0.287626	0	18.2412	100
2019_09B	Spectrum 80	Rock Mg-rich	22.6884	0.179586	25.2432	33.7587	0.157933	0.223347	0.0214997	0.292383	0	17.435	100
2019_09B	Spectrum 18	Rock Mg-rich	15.88	0.0780805	24.4884	36.6323	0.644683	0.976477	0.665887	0.108408	0	20.5256	100
2019_09B	Spectrum 19	Rock Mg-rich	16.1293	0.110726	25.3327	35.6154	0.571477	1.08361	0.520061	0.101899	0	20.5349	100
2019_09B	Spectrum 20	Rock Mg-rich	16.5594	0.0575238	20.1067	37.7471	0.595728	1.35377	0.734207	0.0849257	0	22.7606	100
2019_09B	Spectrum 21	Rock Mg-rich	16.7292	0.100432	20.2926	36.8991	0.739078	1.21278	0.596922	0.0756495	0	23.3543	100
2019_09B	Spectrum 22	Rock Mg-rich	17.5321	0.0675908	20.4978	36.9463	0.520202	1.08552	0.606618	0.158811	0	22.5851	100
2019_09B	Spectrum 23	Rock Mg-rich	17.5625	0.0800149	20.6684	36.9433	0.500597	1.0364	0.734291	0.0789529	0	22.3956	100
2019_09B	Spectrum 25	Rock Mg-rich	15.9885	0.112306	20.0205	38.6395	0.972213	1.08666	0.92504	0.0545616	0	22.2008	100
2019_09B	Spectrum 26	Rock Mg-rich	17.1871	0.164141	20.2751	36.9521	0.6127	1.00112	1.76721	0.0266399	0	22.014	100
2019_09B	Spectrum 27	Rock Mg-rich	16.795	0.0630054	20.6653	37.2096	0.55601	1.07232	0.67788	0.0887038	0	22.8722	100
2019_09B	Spectrum 28	Rock Mg-rich	17.0671	0.110297	20.4319	37.4142	0.70732	1.02834	0.904383	0.103394	0	22.2331	100
2019_09B	Spectrum 29	Rock Mg-rich	16.6109	0.114813	20.5304	36.7998	0.85555	1.07639	0.850997	0.0960952	0	23.0652	100
2019_09B	Spectrum 30	Rock Mg-rich	16.823	0.140644	20.4041	37.1775	0.520558	1.21068	1.07683	0	0	22.6467	100
2019_09B	Spectrum 31	Rock Mg-rich	17.6523	0.109075	20.6567	37.4792	0.423915	1.093	0.394094	0.127884	0	22.0639	100
2019_09B	Spectrum 32	Rock Mg-rich	17.2827	0.0993333	20.7259	37.3204	0.529504	1.06793	0.444148	0	0	22.53	100
2019_09B	Spectrum 36	Rock Mg-rich	16.7245	0.0735735	20.4077	36.8302	0.557368	1.03333	0.462134	0.167163	0	23.744	100
2019_09B	Spectrum 37	Rock Mg-rich	16.9024	0.0990441	20.7081	36.9282	0.601464	1.10412	0.46405	0.138334	0	23.0543	100
2019_09B	Spectrum 38	Rock Mg-rich	16.3966	0.0536755	20.3022	39.2246	0.630615	1.12674	0.656649	0.082914	0	21.526	100
2019_09B	Spectrum 39	Rock Mg-rich	16.6213	0.101575	21.1609	37.9486	0.524041	1.30512	0.422026	0.0122232	0	21.9042	100
2019_09B	Spectrum 40	Rock Mg-rich	16.6926	0.0541036	22.148	36.5618	0.575701	1.03112	0.412624	0.0945166	0	22.4295	100
2019_09B	Spectrum 41	Rock Mg-rich	16.4733	0.135566	20.2066	38.1558	0.534561	1.20221	0.495347	0	0	22.7966	100

## Sheet: Selected analyses
			MgO	Na2O	Al2O3	SiO2	K2O	CaO	TiO2	MnO	FeO			FeO	Fe2O3																																Mg	Na	Al
			Oxide wt (%)																	wt (%)*1000/M.wt													*No of Oxygen														*Nb of Cat. Unit Formula
			40.31	30.99	50.98	60.09	47.1	56.08	47.9	70.9374		Fe+2%	Fe+3%	71.85	79.85		Base			1	0.5	1.5	2	0.5	1	2	1	1	1.5
			MgO	Na2O	Al2O3	SiO2	K2O	CaO	TiO2	MnO	FeO			FeO	Fe2O3					MgO	Na2O	Al2O3	SiO2	K2O	CaO	TiO2	MnO	FeO	Fe2O3				MgO	Na2O	Al2O3	SiO2	K2O	CaO	TiO2	MnO	FeO	Fe2O3	Total				Mg	Na	Al
2019_06	Vend3	Fossil	16.8918	0.13912	21.9802	36.2041	0.697601	0.84299	0.00380307	0.0881568	23.1523	1	0	23.1523	0		25	Vend3	Fossil	419.048	4.48919	431.153	602.497	14.8111	15.0319	0.079396	1.24274	322.231	0		Vend3	Fossil	419.048	2.24459	646.729	1204.99	7.40553	15.0319	0.158792	1.24274	322.231	0	2619.09		Vend3	Fossil	3.99994	0.0428507	4.11549
2019_06	Vend2	Fossil	16.1966	0.130633	22.4152	36.5741	0.749284	0.741119	0.0459707	0.10069	23.0464	1	0	23.0464	0		25	Vend2	Fossil	401.801	4.21532	439.686	608.655	15.9084	13.2154	0.959723	1.41941	320.757	0		Vend2	Fossil	401.801	2.10766	659.529	1217.31	7.95418	13.2154	1.91945	1.41941	320.757	0	2626.01		Vend2	Fossil	3.8252	0.0401304	4.18587
2019_06	Vend1	Fossil	12.8897	0.165541	21.979	38.5336	0.764291	0.930137	0.047896	0.0582092	24.6316	1	0	24.6316	0		25	Vend1	Fossil	319.763	5.34176	431.13	641.265	16.227	16.5859	0.999916	0.820571	342.82	0		Vend1	Fossil	319.763	2.67088	646.695	1282.53	8.11349	16.5859	1.99983	0.820571	342.82	0	2622		Vend1	Fossil	3.04885	0.0509321	4.1107
2019_07B	fibrous21_transv	Fossil	15.1547	0.0880834	21.9789	37.3873	0.138982	0.777548	0	0.104137	24.3703	1	0	24.3703	0		25	fibrous21_transv	Fossil	375.955	2.84232	431.129	622.188	2.95078	13.865	0	1.46802	339.183	0		fibrous21_transv	Fossil	375.955	1.42116	646.693	1244.38	1.47539	13.865	0	1.46802	339.183	0	2624.44		fibrous21_transv	Fossil	3.58129	0.0270755	4.10687
2019_07B	P3_cx2-7_amorphous	Fossil	14.9633	0.494061	22.2594	34.2094	0.11036	0.998125	0.0164861	0.124262	26.7753	1	0	26.7753	0		25	P3_cx2-7_amorphous	Fossil	371.207	15.9426	436.63	569.303	2.3431	17.7982	0.344177	1.75171	372.655	0		P3_cx2-7_amorphous	Fossil	371.207	7.97129	654.945	1138.61	1.17155	17.7982	0.688354	1.75171	372.655	0	2566.79		P3_cx2-7_amorphous	Fossil	3.61547	0.155277	4.25268
2019_07B	fibrous20	Fossil	14.4035	0	21.0436	34.5412	0.172981	0.835085	0.0721134	0.264716	28.6668	1	0	28.6668	0		25	fibrous20	Fossil	357.319	0	412.781	574.825	3.67262	14.891	1.5055	3.73169	398.981	0		fibrous20	Fossil	357.319	0	619.172	1149.65	1.83631	14.891	3.011	3.73169	398.981	0	2548.59		fibrous20	Fossil	3.50506	0	4.04911
2019_07B	fibrous18	Fossil	12.9231	0	19.8697	33.6168	0.149128	0.849059	0.0556057	0.186258	32.3503	1	0	32.3503	0		25	fibrous18	Fossil	320.593	0	389.755	559.441	3.16621	15.1401	1.16087	2.62566	450.248	0		fibrous18	Fossil	320.593	0	584.632	1118.88	1.5831	15.1401	2.32174	2.62566	450.248	0	2496.03		fibrous18	Fossil	3.21104	0	3.90375
2019_07B	fibrous16	Fossil	14.6415	0	21.2877	33.998	0.0680068	0.822602	0.00852271	0.0750931	29.0987	1	0	29.0987	0		25	fibrous16	Fossil	363.222	0	417.569	565.785	1.44388	14.6684	0.177927	1.05858	404.992	0		fibrous16	Fossil	363.222	0	626.353	1131.57	0.721941	14.6684	0.355854	1.05858	404.992	0	2542.94		fibrous16	Fossil	3.57088	0	4.10518
2019_07B	fibrous15	Fossil	13.9677	0	20.6034	35.6874	0.106967	1.26389	0.0527641	0.145421	28.1724	1	0	28.1724	0		25	fibrous15	Fossil	346.508	0	404.146	593.899	2.27107	22.5372	1.10155	2.04999	392.101	0		fibrous15	Fossil	346.508	0	606.219	1187.8	1.13554	22.5372	2.20309	2.04999	392.101	0	2560.55		fibrous15	Fossil	3.38314	0	3.94589
2019_07B	fibrous14	Fossil	12.8425	0	19.5573	34.9606	0.112004	1.09351	0.117874	0.222811	31.0934	1	0	31.0934	0		25	fibrous14	Fossil	318.594	0	383.627	581.804	2.37799	19.4991	2.46083	3.14096	432.754	0		fibrous14	Fossil	318.594	0	575.441	1163.61	1.189	19.4991	4.92167	3.14096	432.754	0	2519.15		fibrous14	Fossil	3.16172	0	3.80711
2019_07B	fibrous13	Fossil	13.213	0	22.2113	39.8393	0.117746	0.989252	0.0567846	0.200127	23.3725	1	0	23.3725	0		25	fibrous13	Fossil	327.785	0	435.687	662.993	2.49992	17.64	1.18548	2.82117	325.295	0		fibrous13	Fossil	327.785	0	653.531	1325.99	1.24996	17.64	2.37097	2.82117	325.295	0	2656.68		fibrous13	Fossil	3.08454	0	4.09992
2019_07B	fibrous11	Fossil	12.7627	0	19.2534	32.44	0.131948	0.657743	0.0426017	0.205302	34.5063	1	0	34.5063	0		25	fibrous11	Fossil	316.613	0	377.667	539.856	2.80143	11.7287	0.889389	2.89413	480.255	0		fibrous11	Fossil	316.613	0	566.5	1079.71	1.40072	11.7287	1.77878	2.89413	480.255	0	2460.88		fibrous11	Fossil	3.21646	0	3.8367
2019_07B	fibrous10	Fossil	13.4163	0	20.4748	34.6231	0.0771914	0.663	0.0679698	0.212546	30.4645	1	0	30.4645	0		25	fibrous10	Fossil	332.829	0	401.625	576.187	1.63888	11.8224	1.41899	2.99625	424.002	0		fibrous10	Fossil	332.829	0	602.437	1152.37	0.819441	11.8224	2.83799	2.99625	424.002	0	2530.12		fibrous10	Fossil	3.28867	0	3.96844
2019_07B	fibrous9	Fossil	13.1536	0.0105556	20.3047	34.1129	0.0237862	0.706845	0.0722901	0.225283	31.3901	1	0	31.3901	0		25	fibrous9	Fossil	326.311	0.340613	398.287	567.696	0.505014	12.6042	1.50919	3.1758	436.884	0		fibrous9	Fossil	326.311	0.170307	597.431	1135.39	0.252507	12.6042	3.01837	3.1758	436.884	0	2515.24		fibrous9	Fossil	3.24334	0.0033855	3.95874
2019_07B	fibrous7	Fossil	14.1905	0	20.9974	33.4885	0.0436544	0.510068	0.0495666	0.202484	30.5166	1	0	30.5166	0		25	fibrous7	Fossil	352.035	0	411.876	557.306	0.926844	9.09536	1.03479	2.85441	424.726	0		fibrous7	Fossil	352.035	0	617.813	1114.61	0.463422	9.09536	2.06958	2.85441	424.726	0	2523.67		fibrous7	Fossil	3.48733	0	4.08013
2019_07B	fibrous6	Fossil	12.6749	0.00501196	20.9554	35.9048	0.0769838	0.598787	0	0.208126	29.576	1	0	29.576	0		25	fibrous6	Fossil	314.435	0.161728	411.051	597.518	1.63447	10.6774	0	2.93393	411.635	0		fibrous6	Fossil	314.435	0.0808641	616.577	1195.04	0.817237	10.6774	0	2.93393	411.635	0	2552.19		fibrous6	Fossil	3.08005	0.00158421	4.02646
2019_07B	fibrous5	Fossil	11.7847	0	22.7274	40.1318	0.0930675	0.957197	0.0770003	0.104672	24.1241	1	0	24.1241	0		25	fibrous5	Fossil	292.352	0	445.811	667.861	1.97596	17.0684	1.60752	1.47555	335.757	0		fibrous5	Fossil	292.352	0	668.716	1335.72	0.987978	17.0684	3.21505	1.47555	335.757	0	2655.29		fibrous5	Fossil	2.75253	0	4.19738
2019_07B	fibrous4	Fossil	13.9296	0	20.3016	33.8404	0.0253174	0.542419	0.0527728	0.129026	31.1592	1	0	31.1592	0		25	fibrous4	Fossil	345.561	0	398.227	563.162	0.537525	9.67224	1.10173	1.81887	433.67	0		fibrous4	Fossil	345.561	0	597.34	1126.32	0.268763	9.67224	2.20346	1.81887	433.67	0	2516.86		fibrous4	Fossil	3.43246	0	3.95559
2019_07B	fibrous3	Fossil	12.1061	0.00992549	22.1288	37.7793	0.0641764	0.771829	0.0750907	0.0270429	27.037	1	0	27.037	0		25	fibrous3	Fossil	300.324	0.32028	434.069	628.711	1.36256	13.763	1.56765	0.381222	376.298	0		fibrous3	Fossil	300.324	0.16014	651.104	1257.42	0.681278	13.763	3.13531	0.381222	376.298	0	2603.27		fibrous3	Fossil	2.88411	0.00307575	4.1685
2019_07B	fibrous2	Fossil	13.9963	0	20.7465	35.1325	0.110138	0.61661	0.0804752	0.263772	29.0537	1	0	29.0537	0		25	fibrous2	Fossil	347.216	0	406.954	584.665	2.33838	10.9952	1.68007	3.71838	404.366	0		fibrous2	Fossil	347.216	0	610.431	1169.33	1.16919	10.9952	3.36013	3.71838	404.366	0	2550.59		fibrous2	Fossil	3.4033	0	3.98883
2019_07B	fibrous1	Fossil	12.5577	0.00553814	22.6882	39.6773	0.0269562	0.819678	0.038377	0.149305	24.0252	1	0	24.0252	0		25	fibrous1	Fossil	311.529	0.178707	445.041	660.297	0.572319	14.6162	0.801189	2.10474	334.379	0		fibrous1	Fossil	311.529	0.0893537	667.562	1320.59	0.286159	14.6162	1.60238	2.10474	334.379	0	2652.76		fibrous1	Fossil	2.93589	0.00168416	4.19413
2019_07B	vend_bloc2_fibrous7	Fossil	15.5047	0.244587	22.3044	36.0566	0.636264	0.936147	0.0358545	0.0849905	24.1965	1	0	24.1965	0		25	vend_bloc2_fibrous7	Fossil	384.637	7.89246	437.514	600.043	13.5088	16.6931	0.748527	1.19811	336.763	0		vend_bloc2_fibrous7	Fossil	384.637	3.94623	656.27	1200.09	6.7544	16.6931	1.49705	1.19811	336.763	0	2607.84		vend_bloc2_fibrous7	Fossil	3.6873	0.0756608	4.19421
2019_07B	vend_bloc2_fibrous6	Fossil	15.7668	0.0508943	22.3833	35.0569	0.39135	0.914926	0.00912286	0.129249	25.2878	1	0	25.2878	0		25	vend_bloc2_fibrous6	Fossil	391.14	1.64228	439.061	583.406	8.30891	16.3147	0.190456	1.82201	351.953	0		vend_bloc2_fibrous6	Fossil	391.14	0.82114	658.591	1166.81	4.15445	16.3147	0.380913	1.82201	351.953	0	2591.99		vend_bloc2_fibrous6	Fossil	3.77258	0.01584	4.23478
2019_07B	vend_bloc2_fibrous5	Fossil	15.1929	0.087358	22.5736	37.6042	0.184795	1.30142	0	0.0790803	22.9735	1	0	22.9735	0		25	vend_bloc2_fibrous5	Fossil	376.902	2.81891	442.792	625.798	3.92346	23.2064	0	1.11479	319.743	0		vend_bloc2_fibrous5	Fossil	376.902	1.40945	664.189	1251.6	1.96173	23.2064	0	1.11479	319.743	0	2640.12		vend_bloc2_fibrous5	Fossil	3.56898	0.026693	4.19292
2019_07B	vend_bloc2_fibrous4	Fossil	13.9896	0.051879	21.7623	38.5761	0.334587	1.09446	0.0675199	0.121507	23.961	1	0	23.961	0		25	vend_bloc2_fibrous4	Fossil	347.05	1.67405	426.879	641.971	7.10377	19.516	1.4096	1.71288	333.486	0		vend_bloc2_fibrous4	Fossil	347.05	0.837027	640.318	1283.94	3.55188	19.516	2.8192	1.71288	333.486	0	2633.23		vend_bloc2_fibrous4	Fossil	3.29491	0.0158935	4.0528
2019_07B	vend_bloc2_fibrous3	Fossil	15.3536	0.150964	21.7355	33.9618	0.158428	1.00343	0.0441459	0.197075	27.3809	1	0	27.3809	0		25	vend_bloc2_fibrous3	Fossil	380.889	4.87137	426.353	565.182	3.36365	17.8928	0.921627	2.77815	381.084	0		vend_bloc2_fibrous3	Fossil	380.889	2.43569	639.529	1130.36	1.68183	17.8928	1.84325	2.77815	381.084	0	2558.5		vend_bloc2_fibrous3	Fossil	3.72181	0.0475999	4.16604
2019_07B	vend_bloc2_fibrous2	Fossil	13.7044	0.111442	20.7816	39.8809	0.159298	1.51603	0.0433163	0.0683723	23.7304	1	0	23.7304	0		25	vend_bloc2_fibrous2	Fossil	339.974	3.59606	407.642	663.686	3.38213	27.0334	0.904306	0.96384	330.277	0		vend_bloc2_fibrous2	Fossil	339.974	1.79803	611.464	1327.37	1.69107	27.0334	1.80861	0.96384	330.277	0	2642.38		vend_bloc2_fibrous2	Fossil	3.21655	0.0340229	3.85677
2019_07B	vend_bloc2_fibrous1	Fossil	16.1503	0.0500188	22.4296	36.4203	0.347298	0.910068	0	0.126841	23.5367	1	0	23.5367	0		25	vend_bloc2_fibrous1	Fossil	400.652	1.61403	439.968	606.096	7.37363	16.228	0	1.78807	327.582	0		vend_bloc2_fibrous1	Fossil	400.652	0.807015	659.952	1212.19	3.68681	16.228	0	1.78807	327.582	0	2622.89		vend_bloc2_fibrous1	Fossil	3.81881	0.0153841	4.19355
2019_09B	Spectrum 1	Fossil Mg-rich	17.2441	0.0649127	21.6231	36.5092	0.2806	1.05073	0.0463228	0.132656	23.0483	1	0	23.0483	0		25	Spectrum 1	Fossil Mg-rich	427.788	2.09463	424.149	607.576	5.95755	18.7362	0.967074	1.87004	320.784	0		Spectrum 1	Fossil Mg-rich	427.788	1.04732	636.224	1215.15	2.97877	18.7362	1.93415	1.87004	320.784	0	2626.51		Spectrum 1	Fossil Mg-rich	4.07183	0.0199374	4.03719
2019_09B	Spectrum 2	Fossil Mg-rich	17.8338	0.126926	22.1583	36.5581	0.141955	0.902085	0	0.127572	22.1513	1	0	22.1513	0		25	Spectrum 2	Fossil Mg-rich	442.415	4.09572	434.647	608.388	3.01392	16.0857	0	1.79837	308.3	0		Spectrum 2	Fossil Mg-rich	442.415	2.04786	651.971	1216.78	1.50696	16.0857	0	1.79837	308.3	0	2640.9		Spectrum 2	Fossil Mg-rich	4.18811	0.038772	4.11457
2019_09B	Spectrum 3	Fossil Mg-rich	16.0062	0.179002	21.9756	36.3743	0.320226	0.848317	0.0160687	0.143703	24.1367	1	0	24.1367	0		25	Spectrum 3	Fossil Mg-rich	397.077	5.77612	431.063	605.33	6.79885	15.1269	0.335463	2.02577	335.931	0		Spectrum 3	Fossil Mg-rich	397.077	2.88806	646.594	1210.66	3.39943	15.1269	0.670927	2.02577	335.931	0	2614.37		Spectrum 3	Fossil Mg-rich	3.79706	0.0552342	4.12205
2019_09B	Spectrum 4	Fossil Mg-rich	16.1775	0.171119	22.069	36.5898	0.293751	0.901687	0	0.129969	23.6672	1	0	23.6672	0		25	Spectrum 4	Fossil Mg-rich	401.327	5.52174	432.895	608.916	6.23676	16.0786	0	1.83216	329.398	0		Spectrum 4	Fossil Mg-rich	401.327	2.76087	649.342	1217.83	3.11838	16.0786	0	1.83216	329.398	0	2621.69		Spectrum 4	Fossil Mg-rich	3.82699	0.0526544	4.12801
2019_09B	Spectrum 5	Fossil Mg-rich	16.1153	0.17839	22.855	38.0127	0.266754	0.992666	0.0346706	0.0789377	21.4656	1	0	21.4656	0		25	Spectrum 5	Fossil Mg-rich	399.784	5.75637	448.313	632.596	5.66356	17.7009	0.723812	1.11278	298.756	0		Spectrum 5	Fossil Mg-rich	399.784	2.87818	672.469	1265.19	2.83178	17.7009	1.44762	1.11278	298.756	0	2662.17		Spectrum 5	Fossil Mg-rich	3.75431	0.0540571	4.21003
2019_09B	Spectrum 6	Fossil Mg-rich	16.8434	0.121423	22.2266	36.2105	0.291424	0.922743	0.00600111	0.109936	23.268	1	0	23.268	0		25	Spectrum 6	Fossil Mg-rich	417.848	3.91813	435.986	602.604	6.18735	16.454	0.125284	1.54977	323.841	0		Spectrum 6	Fossil Mg-rich	417.848	1.95906	653.98	1205.21	3.09367	16.454	0.250568	1.54977	323.841	0	2624.18		Spectrum 6	Fossil Mg-rich	3.98074	0.0373271	4.15354
2019_09B	Spectrum 7	Fossil Mg-rich	16.6664	0.152154	21.8936	36.7559	0.333679	1.00019	0.037946	0.174728	22.9854	1	0	22.9854	0		25	Spectrum 7	Fossil Mg-rich	413.455	4.90978	429.455	611.681	7.08447	17.8351	0.792192	2.46314	319.909	0		Spectrum 7	Fossil Mg-rich	413.455	2.45489	644.182	1223.36	3.54224	17.8351	1.58438	2.46314	319.909	0	2628.79		Spectrum 7	Fossil Mg-rich	3.93199	0.0466924	4.08415
2019_09B	Spectrum 8	Fossil Mg-rich	16.3771	0.111129	22.1313	36.5895	0.424028	0.809944	0.0448217	0.106291	23.4059	1	0	23.4059	0		25	Spectrum 8	Fossil Mg-rich	406.28	3.58596	434.116	608.912	9.00273	14.4427	0.935734	1.49838	325.76	0		Spectrum 8	Fossil Mg-rich	406.28	1.79298	651.175	1217.82	4.50136	14.4427	1.87147	1.49838	325.76	0	2625.15		Spectrum 8	Fossil Mg-rich	3.86912	0.0341501	4.13421
2019_09B	Spectrum 9	Fossil Mg-rich	16.2962	0.103482	22.3122	36.7855	0.313599	0.908643	0.0807917	0.143358	23.0563	1	0	23.0563	0		25	Spectrum 9	Fossil Mg-rich	404.272	3.33921	437.666	612.173	6.65816	16.2026	1.68668	2.02091	320.895	0		Spectrum 9	Fossil Mg-rich	404.272	1.66961	656.498	1224.35	3.32908	16.2026	3.37335	2.02091	320.895	0	2632.61		Spectrum 9	Fossil Mg-rich	3.83908	0.0317101	4.1562
2019_09B	Spectrum 10	Fossil Mg-rich	16.4501	0.185956	22.5717	37.0465	0.283172	0.856636	0.0413628	0.0653251	22.4994	1	0	22.4994	0		25	Spectrum 10	Fossil Mg-rich	408.089	6.00051	442.755	616.517	6.01214	15.2752	0.863524	0.920883	313.143	0		Spectrum 10	Fossil Mg-rich	408.089	3.00026	664.133	1233.03	3.00607	15.2752	1.72705	0.920883	313.143	0	2642.33		Spectrum 10	Fossil Mg-rich	3.86107	0.056773	4.18906
2019_09B	Spectrum 11	Fossil Mg-rich	15.7528	0.183888	23.6805	37.0758	0.320191	0.773862	0.0565223	0.108675	22.0478	1	0	22.0478	0		25	Spectrum 11	Fossil Mg-rich	390.791	5.93377	464.505	617.005	6.79812	13.7993	1.18001	1.53198	306.858	0		Spectrum 11	Fossil Mg-rich	390.791	2.96689	696.758	1234.01	3.39906	13.7993	2.36001	1.53198	306.858	0	2652.47		Spectrum 11	Fossil Mg-rich	3.68327	0.0559268	4.37804
2019_09B	Spectrum 12	Fossil Mg-rich	16.6471	0.145015	22.2829	36.5888	0.346103	0.888527	0.0493965	0.0676612	22.9845	1	0	22.9845	0		25	Spectrum 12	Fossil Mg-rich	412.976	4.6794	437.092	608.899	7.34826	15.8439	1.03124	0.953816	319.896	0		Spectrum 12	Fossil Mg-rich	412.976	2.3397	655.638	1217.8	3.67413	15.8439	2.06249	0.953816	319.896	0	2631.18		Spectrum 12	Fossil Mg-rich	3.92386	0.044461	4.153
2019_09B	Spectrum 13	Fossil Mg-rich	15.9754	0.0812468	22.4627	34.6743	0.402315	0.621646	0.133145	0.1311	25.5181	1	0	25.5181	0		25	Spectrum 13	Fossil Mg-rich	396.314	2.62171	440.618	577.04	8.54172	11.085	2.77964	1.84811	355.158	0		Spectrum 13	Fossil Mg-rich	396.314	1.31086	660.927	1154.08	4.27086	11.085	5.55927	1.84811	355.158	0	2590.55		Spectrum 13	Fossil Mg-rich	3.82461	0.0253007	4.25216
2019_09B	Spectrum 14	Fossil Mg-rich	16.2796	0.0985477	22.1265	35.9466	0.391587	0.708662	0.0742565	0.142571	24.2317	1	0	24.2317	0		25	Spectrum 14	Fossil Mg-rich	403.86	3.17999	434.022	598.213	8.31395	12.6366	1.55024	2.00982	337.253	0		Spectrum 14	Fossil Mg-rich	403.86	1.58999	651.034	1196.43	4.15697	12.6366	3.10048	2.00982	337.253	0	2612.07		Spectrum 14	Fossil Mg-rich	3.86533	0.0304355	4.15401
2019_09B	Spectrum 15	Fossil Mg-rich	16.5084	0.143614	22.0323	36.1112	0.407145	0.839834	0.0323196	0.16101	23.7641	1	0	23.7641	0		25	Spectrum 15	Fossil Mg-rich	409.537	4.63421	432.176	600.951	8.64428	14.9756	0.674731	2.26975	330.746	0		Spectrum 15	Fossil Mg-rich	409.537	2.31711	648.264	1201.9	4.32214	14.9756	1.34946	2.26975	330.746	0	2615.68		Spectrum 15	Fossil Mg-rich	3.91424	0.0442925	4.13062
2019_09B	Spectrum 16	Fossil Mg-rich	16.7664	0.155053	21.6997	36.1208	0.324071	1.00945	0.0516825	0.0674726	23.8053	1	0	23.8053	0		25	Spectrum 16	Fossil Mg-rich	415.938	5.00334	425.652	601.112	6.88048	18.0002	1.07897	0.951157	331.319	0		Spectrum 16	Fossil Mg-rich	415.938	2.50167	638.477	1202.22	3.44024	18.0002	2.15793	0.951157	331.319	0	2615.01		Spectrum 16	Fossil Mg-rich	3.97645	0.0478329	4.06931
2019_09B	Spectrum 17	Fossil Mg-rich	16.2919	0.127691	22.7597	34.3815	0.236018	0.702298	0	0.133965	25.367	1	0	25.367	0		25	Spectrum 17	Fossil Mg-rich	404.165	4.1204	446.443	572.167	5.01099	12.5231	0	1.88849	353.054	0		Spectrum 17	Fossil Mg-rich	404.165	2.0602	669.664	1144.33	2.5055	12.5231	0	1.88849	353.054	0	2590.2		Spectrum 17	Fossil Mg-rich	3.90092	0.0397692	4.30897
2019_09B	Spectrum 18	Fossil Mg-rich	16.7034	0.11947	22.2193	35.8662	0.36992	0.935591	0	0.0824017	23.7037	1	0	23.7037	0		25	Spectrum 18	Fossil Mg-rich	414.374	3.85512	435.843	596.875	7.85392	16.6832	0	1.16161	329.905	0		Spectrum 18	Fossil Mg-rich	414.374	1.92756	653.764	1193.75	3.92696	16.6832	0	1.16161	329.905	0	2615.49		Spectrum 18	Fossil Mg-rich	3.96076	0.0368489	4.16597
2019_09B	Spectrum 19	Fossil Mg-rich	15.9932	0.11273	22.4135	35.5923	0.375742	0.776375	0.0417534	0.11375	24.5807	1	0	24.5807	0		25	Spectrum 19	Fossil Mg-rich	396.756	3.63763	439.652	592.316	7.97753	13.8441	0.871677	1.60353	342.111	0		Spectrum 19	Fossil Mg-rich	396.756	1.81881	659.479	1184.63	3.98877	13.8441	1.74335	1.60353	342.111	0	2605.98		Spectrum 19	Fossil Mg-rich	3.80621	0.034897	4.21773
2019_09B	Spectrum 20	Fossil Mg-rich	15.9014	0.101064	22.3503	37.2519	0.336145	0.887789	0.0179482	0.154604	22.9988	1	0	22.9988	0		25	Spectrum 20	Fossil Mg-rich	394.479	3.26117	438.412	619.936	7.13683	15.8308	0.374702	2.17944	320.095	0		Spectrum 20	Fossil Mg-rich	394.479	1.63059	657.619	1239.87	3.56842	15.8308	0.749404	2.17944	320.095	0	2636.02		Spectrum 20	Fossil Mg-rich	3.74123	0.0309289	4.1579
2019_09B	Spectrum 21	Fossil Mg-rich	17.3671	0.144643	22.1495	36.4233	0.226873	0.929886	0.0243575	0.104674	22.6296	1	0	22.6296	0		25	Spectrum 21	Fossil Mg-rich	430.839	4.66742	434.474	606.146	4.81684	16.5814	0.508507	1.47558	314.956	0		Spectrum 21	Fossil Mg-rich	430.839	2.33371	651.711	1212.29	2.40842	16.5814	1.01701	1.47558	314.956	0	2633.62		Spectrum 21	Fossil Mg-rich	4.08981	0.0443062	4.12431
2019_09B	Spectrum 22	Fossil Mg-rich	15.4319	0.0836838	22.7224	37.0652	0.404776	0.83279	0.0131613	0.108889	23.3372	1	0	23.3372	0		25	Spectrum 22	Fossil Mg-rich	382.831	2.70035	445.711	616.828	8.59398	14.85	0.274767	1.53501	324.804	0		Spectrum 22	Fossil Mg-rich	382.831	1.35017	668.567	1233.66	4.29699	14.85	0.549533	1.53501	324.804	0	2632.44		Spectrum 22	Fossil Mg-rich	3.63571	0.0256449	4.23287
2019_07B	vend_bloc2_fibrou-Mgpoor10	Fossil	3.36402	0.0727628	29.0983	59.7894	0.0979738	2.30713	0.00101248	0.0355467	5.22741	0	1	0	5.80945		11	vend_bloc2_fibrou-Mgpoor10	Fossil	83.4538	2.34794	570.778	994.998	2.08012	41.14	0.0211374	0.5011	0	72.7545		vend_bloc2_fibrou-Mgpoor10	Fossil	83.4538	1.17397	856.167	1990	1.04006	41.14	0.0422748	0.5011	0	109.132	3082.64		vend_bloc2_fibrou-Mgpoor10	Fossil	0.297794	0.00837832	2.03674
2019_07B	vend_bloc2_fibrou-Mgpoor6	Fossil	4.40888	0.0845774	24.3901	58.2784	0.113884	2.59621	0	0	10.1268	0	1	0	11.2543		11	vend_bloc2_fibrou-Mgpoor6	Fossil	109.374	2.72918	478.425	969.852	2.41793	46.2948	0	0	0	140.943		vend_bloc2_fibrou-Mgpoor6	Fossil	109.374	1.36459	717.637	1939.7	1.20896	46.2948	0	0	0	211.415	3027		vend_bloc2_fibrou-Mgpoor6	Fossil	0.397462	0.00991775	1.73858
2019_07B	vend_bloc2_fibrou-Mgpoor4	Fossil	3.05557	0.158299	26.3168	60.8413	0.105154	2.72708	0	0.00598056	6.74404	0	1	0	7.49494		11	vend_bloc2_fibrou-Mgpoor4	Fossil	75.8017	5.10807	516.219	1012.5	2.23256	48.6284	0	0.0843076	0	93.8628		vend_bloc2_fibrou-Mgpoor4	Fossil	75.8017	2.55404	774.328	2025	1.11628	48.6284	0	0.0843076	0	140.794	3068.31		vend_bloc2_fibrou-Mgpoor4	Fossil	0.271751	0.0183126	1.85066
2019_07B	vend_bloc2_fibrou-Mgpoor3	Fossil	3.95969	0.0788464	26.0477	58.1639	0.219123	2.41322	0.00700637	0.0334647	9.07703	0	1	0	10.0877		11	vend_bloc2_fibrou-Mgpoor3	Fossil	98.2309	2.54425	510.94	967.947	4.6523	43.0318	0.146271	0.471749	0	126.333		vend_bloc2_fibrou-Mgpoor3	Fossil	98.2309	1.27213	766.409	1935.89	2.32615	43.0318	0.292541	0.471749	0	189.5	3037.43		vend_bloc2_fibrou-Mgpoor3	Fossil	0.355742	0.00921397	1.85036
2019_07B	vend_bloc2_fibrou-Mgpoor2	Fossil	3.29221	0.0880386	25.092	59.1413	0.177188	2.73816	0.0109337	0	9.45506	0	1	0	10.5078		11	vend_bloc2_fibrou-Mgpoor2	Fossil	81.6723	2.84087	492.192	984.212	3.76195	48.8259	0.228261	0	0	131.594		vend_bloc2_fibrou-Mgpoor2	Fossil	81.6723	1.42044	738.288	1968.42	1.88097	48.8259	0.456522	0	0	197.392	3038.36		vend_bloc2_fibrou-Mgpoor2	Fossil	0.295684	0.010285	1.78192
2019_09B	Spectrum 71	Rock Mg-rich clay	16.4232	0.0499259	22.051	39.1655	0.650126	0.287077	0.0387123	0.0941237	21.2403	1	0	21.2403	0		25	Spectrum 71	Rock Mg-rich clay	407.422	1.61103	432.543	651.78	13.8031	5.11906	0.808189	1.32686	295.621	0		Spectrum 71	Rock Mg-rich clay	407.422	0.805517	648.814	1303.56	6.90155	5.11906	1.61638	1.32686	295.621	0	2671.19		Spectrum 71	Rock Mg-rich clay	3.81312	0.0150779	4.04823
2019_09B	Spectrum 72	Rock Mg-rich clay	15.5331	0.0808382	22.243	41.2309	0.834932	0.26	0.0491929	0.0842346	19.6839	1	0	19.6839	0		25	Spectrum 72	Rock Mg-rich clay	385.341	2.60853	436.308	686.152	17.7268	4.63623	1.02699	1.18745	273.958	0		Spectrum 72	Rock Mg-rich clay	385.341	1.30426	654.461	1372.3	8.8634	4.63623	2.05398	1.18745	273.958	0	2704.11		Spectrum 72	Rock Mg-rich clay	3.56255	0.0241163	4.03374
2019_09B	Spectrum 73	Rock Mg-rich clay	13.3257	0.0817711	24.4996	41.9768	1.78386	0.24308	0.0254554	0.0697545	17.994	1	0	17.994	0		25	Spectrum 73	Rock Mg-rich clay	330.582	2.63863	480.572	698.565	37.8738	4.33452	0.531429	0.983324	250.438	0		Spectrum 73	Rock Mg-rich clay	330.582	1.31931	720.858	1397.13	18.9369	4.33452	1.06286	0.983324	250.438	0	2725.65		Spectrum 73	Rock Mg-rich clay	3.03214	0.0242019	4.40787
2019_09B	Spectrum 74	Rock Mg-rich clay	16.6372	0.104347	22.1128	39.2569	1.03889	0.231966	0.0139692	0.163196	20.4407	1	0	20.4407	0		25	Spectrum 74	Rock Mg-rich clay	412.732	3.36712	433.754	653.302	22.0571	4.13635	0.291632	2.30056	284.492	0		Spectrum 74	Rock Mg-rich clay	412.732	1.68356	650.631	1306.6	11.0285	4.13635	0.583265	2.30056	284.492	0	2674.19		Spectrum 74	Rock Mg-rich clay	3.85847	0.0314779	4.055
2019_09B	Spectrum 75	Rock Mg-rich clay	17.39	0.111841	21.8363	39.054	0.929095	0.295177	0.010202	0.162952	20.2105	1	0	20.2105	0		25	Spectrum 75	Rock Mg-rich clay	431.406	3.60893	428.331	649.924	19.726	5.26351	0.212985	2.29712	281.287	0		Spectrum 75	Rock Mg-rich clay	431.406	1.80447	642.497	1299.85	9.863	5.26351	0.425971	2.29712	281.287	0	2674.69		Spectrum 75	Rock Mg-rich clay	4.03229	0.0337322	4.00356
2019_06	Vend_Rock2	Rock matrix	2.44594	0.334545	29.8628	56.2156	7.91722	0.303323	0.123389	0.044991	2.75217	0	1	0	3.05861		11	Vend_Rock2	Rock matrix	60.6782	10.7953	585.775	935.523	168.094	5.40876	2.57597	0.634235	0	38.3044		Vend_Rock2	Rock matrix	60.6782	5.39763	878.663	1871.05	84.0469	5.40876	5.15194	0.634235	0	57.4566	2968.48		Vend_Rock2	Rock matrix	0.224849	0.0400029	2.17065
2019_09	v_matrix3	Rock matrix	1.82708	0.187381	30.8541	58.4937	5.41469	0.375332	0.266008	0	2.55507	0	1	0	2.83956		11	v_matrix3	Rock matrix	45.3257	6.04651	605.22	973.435	114.962	6.69279	5.55341	0	0	35.5612		v_matrix3	Rock matrix	45.3257	3.02326	907.83	1946.87	57.4808	6.69279	11.1068	0	0	53.3417	3031.67		v_matrix3	Rock matrix	0.164458	0.0219389	2.19596
2019_09	v_matrix4	Rock matrix	3.07313	0.14865	24.672	61.9893	5.55217	0.610966	0.409199	0	3.5446	0	1	0	3.93927		11	v_matrix4	Rock matrix	76.2374	4.7967	483.954	1031.61	117.881	10.8946	8.54279	0	0	49.3334		v_matrix4	Rock matrix	76.2374	2.39835	725.931	2063.22	58.9403	10.8946	17.0856	0	0	74.0001	3028.7		v_matrix4	Rock matrix	0.276888	0.0174212	1.75768
2019_09	v_matrix5	Rock matrix	4.22811	0.137741	27.2449	60.3681	4.13987	0.83877	0.160636	0.0648544	2.76938	0	1	0	3.07773		11	v_matrix5	Rock matrix	104.89	4.4447	534.424	1004.63	87.8954	14.9567	3.35357	0.914248	0	38.5439		v_matrix5	Rock matrix	104.89	2.22235	801.636	2009.26	43.9477	14.9567	6.70715	0.914248	0	57.8159	3042.35		v_matrix5	Rock matrix	0.379243	0.0160704	1.93228
2019_09	v_matrix7	Rock matrix	4.7049	0.124944	28.3231	51.9015	7.78862	0.3694	0.418045	0.0861268	6.2751	0	1	0	6.97379		11	v_matrix7	Rock matrix	116.718	4.03175	555.572	863.729	165.363	6.58701	8.72745	1.21412	0	87.3361		v_matrix7	Rock matrix	116.718	2.01587	833.359	1727.46	82.6817	6.58701	17.4549	1.21412	0	131.004	2918.49		v_matrix7	Rock matrix	0.439918	0.0151959	2.09399
2019_09	v_matrix9	Rock matrix	5.031	0.0572366	27.4937	53.7963	8.16971	0.2711	0.299659	0	4.86823	0	1	0	5.41028		11	v_matrix9	Rock matrix	124.808	1.84694	539.304	895.262	173.454	4.83417	6.25594	0	0	67.7555		v_matrix9	Rock matrix	124.808	0.923468	808.956	1790.52	86.7272	4.83417	12.5119	0	0	101.633	2930.92		v_matrix9	Rock matrix	0.468415	0.00693172	2.02406
2019_09	v_matrix10	Rock matrix	5.29575	0.0668816	23.631	56.0474	6.94957	0.403673	0.988536	0.130654	6.46275	0	1	0	7.18233		11	v_matrix10	Rock matrix	131.376	2.15817	463.536	932.724	147.549	7.19817	20.6375	1.84182	0	89.9478		v_matrix10	Rock matrix	131.376	1.07908	695.303	1865.45	73.7746	7.19817	41.275	1.84182	0	134.922	2952.22		v_matrix10	Rock matrix	0.489507	0.00804136	1.72714
2019_09	v_matrix12	Rock matrix	6.14582	0.10467	25.1219	54.3748	5.70304	0.844575	0.962201	0.10738	6.63571	0	1	0	7.37455		11	v_matrix12	Rock matrix	152.464	3.37753	492.779	904.889	121.084	15.0602	20.0877	1.51374	0	92.3551		v_matrix12	Rock matrix	152.464	1.68877	739.168	1809.78	60.5418	15.0602	40.1754	1.51374	0	138.533	2958.92		v_matrix12	Rock matrix	0.566795	0.0125562	1.83194
2019_09	v_matrix13	Rock matrix	4.66238	0.190576	25.0108	56.7003	6.17516	0.604598	0.528522	0.122561	6.0051	0	1	0	6.67373		11	v_matrix13	Rock matrix	115.663	6.14959	490.601	943.589	131.108	10.781	11.0339	1.72773	0	83.5783		v_matrix13	Rock matrix	115.663	3.07479	735.901	1887.18	65.5538	10.781	22.0677	1.72773	0	125.367	2967.32		v_matrix13	Rock matrix	0.42877	0.0227969	1.81868
2019_09	v_matrix16	Rock matrix	3.84796	0.0672465	26.5666	56.8906	7.64345	0.479442	0.517943	0	3.98679	0	1	0	4.4307		11	v_matrix16	Rock matrix	95.4591	2.16994	521.118	946.756	162.281	8.54926	10.813	0	0	55.4877		v_matrix16	Rock matrix	95.4591	1.08497	781.677	1893.51	81.1407	8.54926	21.626	0	0	83.2316	2966.28		v_matrix16	Rock matrix	0.353995	0.00804689	1.93249
2019_09	v_matrix19	Rock matrix	4.86514	0.0509592	24.7527	55.5355	7.58114	0.202848	0.154504	0.056889	6.80028	0	1	0	7.55744		11	v_matrix19	Rock matrix	120.693	1.64437	485.537	924.206	160.958	3.61711	3.22556	0.801961	0	94.6455		v_matrix19	Rock matrix	120.693	0.822187	728.306	1848.41	80.4791	3.61711	6.45112	0.801961	0	141.968	2931.55		v_matrix19	Rock matrix	0.452875	0.00617015	1.82187
2019_09	v_matrix_esc2	Rock matrix sme?	2.39001	0.220603	25.393	62.448	3.99386	0.979571	0.133906	0.0269907	4.39948	0	1	0	4.88933		11	v_matrix_esc2	Rock matrix sme?	59.2908	7.11852	498.098	1039.24	84.7952	17.4674	2.79554	0.380486	0	61.2315		v_matrix_esc2	Rock matrix sme?	59.2908	3.55926	747.147	2078.48	42.3976	17.4674	5.59108	0.380486	0	91.8472	3046.16		v_matrix_esc2	Rock matrix sme?	0.214105	0.0257057	1.79868
2019_09B	Spectrum 42	Rock mica musc-like	3.30656	0.069659	26.0789	57.3708	7.50389	0.116542	0.167958	0.0418668	5.34379	0	1	0	5.93878		11	Spectrum 42	Rock mica musc-like	82.0282	2.24779	511.552	954.748	159.318	2.07814	3.50644	0.590193	0	74.3742		Spectrum 42	Rock mica musc-like	82.0282	1.1239	767.329	1909.5	79.6592	2.07814	7.01287	0.590193	0	111.561	2960.88		Spectrum 42	Rock mica musc-like	0.304744	0.0083508	1.90048
2019_09B	Spectrum 43	Rock mica musc-like	3.37487	0.145423	26.7033	55.052	8.00646	0.14405	0.218469	0.00824552	6.34719	0	1	0	7.0539		11	Spectrum 43	Rock mica musc-like	83.723	4.69259	523.799	916.16	169.989	2.56865	4.56095	0.116237	0	88.3394		Spectrum 43	Rock mica musc-like	83.723	2.34629	785.698	1832.32	84.9943	2.56865	9.1219	0.116237	0	132.509	2933.4		Spectrum 43	Rock mica musc-like	0.313954	0.0175968	1.9642
2019_09B	Spectrum 44	Rock mica musc-like	3.16258	0.152561	26.52	55.3292	7.94849	0.0647717	0.323637	0.0274055	6.47144	0	1	0	7.19199		11	Spectrum 44	Rock mica musc-like	78.4564	4.92291	520.203	920.771	168.758	1.15499	6.75651	0.386334	0	90.0687		Spectrum 44	Rock mica musc-like	78.4564	2.46145	780.305	1841.54	84.3789	1.15499	13.513	0.386334	0	135.103	2937.3		Spectrum 44	Rock mica musc-like	0.293814	0.018436	1.94813
2019_09B	Spectrum 45	Rock mica musc-like	3.19628	0.0758229	26.279	55.2614	7.9392	0.226046	0.211293	0.00107817	6.80987	0	1	0	7.5681		11	Spectrum 45	Rock mica musc-like	79.2926	2.44669	515.476	919.645	168.56	4.03078	4.41113	0.0151989	0	94.779		Spectrum 45	Rock mica musc-like	79.2926	1.22334	773.214	1839.29	84.2802	4.03078	8.82225	0.0151989	0	142.168	2932.34		Spectrum 45	Rock mica musc-like	0.297448	0.0091782	1.93369
2019_09B	Spectrum 46	Rock mica musc-like	3.40301	0.0623338	26.7177	55.3317	8.07339	0.123239	0.21045	0.050381	6.02776	0	1	0	6.69891		11	Spectrum 46	Rock mica musc-like	84.421	2.01142	524.083	920.814	171.409	2.19757	4.39352	0.710217	0	83.8937		Spectrum 46	Rock mica musc-like	84.421	1.00571	786.124	1841.63	85.7047	2.19757	8.78705	0.710217	0	125.841	2936.42		Spectrum 46	Rock mica musc-like	0.316246	0.00753489	1.96325
2019_09B	Spectrum 47	Rock mica musc-like	3.20565	0.098207	26.612	55.2887	8.58293	0.0984711	0.217355	0	5.89664	0	1	0	6.5532		11	Spectrum 47	Rock mica musc-like	79.5248	3.16899	522.009	920.099	182.228	1.7559	4.53769	0	0	82.0688		Spectrum 47	Rock mica musc-like	79.5248	1.58449	783.014	1840.2	91.1139	1.7559	9.07537	0	0	123.103	2929.37		Spectrum 47	Rock mica musc-like	0.298622	0.0118998	1.96018
2019_09B	Spectrum 48	Rock mica musc-like	3.46906	0.0368484	26.833	55.9021	8.08532	0.125292	0.160035	0.0535794	5.3348	0	1	0	5.92879		11	Spectrum 48	Rock mica musc-like	86.0595	1.18904	526.343	930.306	171.663	2.23417	3.34101	0.755306	0	74.2491		Spectrum 48	Rock mica musc-like	86.0595	0.594521	789.514	1860.61	85.8315	2.23417	6.68203	0.755306	0	111.374	2943.66		Spectrum 48	Rock mica musc-like	0.321591	0.00444327	1.96686
2019_09B	Spectrum 49	Rock mica musc-like	3.17419	0.214804	26.9622	56.4956	7.8765	0.127006	0.130725	0.0587386	4.96022	0	1	0	5.51251		11	Spectrum 49	Rock mica musc-like	78.7444	6.93141	528.878	940.183	167.229	2.26473	2.72912	0.828035	0	69.0358		Spectrum 49	Rock mica musc-like	78.7444	3.4657	793.317	1880.37	83.6147	2.26473	5.45825	0.828035	0	103.554	2951.61		Spectrum 49	Rock mica musc-like	0.293463	0.0258318	1.97101
2019_09B	Spectrum 50	Rock mica musc-like	3.15151	0.0552622	27.1979	55.6682	8.26255	0.114032	0.156891	0.00263328	5.39098	0	1	0	5.99123		11	Spectrum 50	Rock mica musc-like	78.1819	1.78323	533.502	926.414	175.426	2.03338	3.27538	0.0371212	0	75.031		Spectrum 50	Rock mica musc-like	78.1819	0.891614	800.253	1852.83	87.7128	2.03338	6.55075	0.0371212	0	112.547	2941.03		Spectrum 50	Rock mica musc-like	0.292414	0.00666959	1.99539
2019_09B	Spectrum 51	Rock mica musc-like	3.56149	0.0633778	26.9868	55.5225	8.0043	0.258623	0.157806	0.0250708	5.42003	0	1	0	6.02352		11	Spectrum 51	Rock mica musc-like	88.3525	2.0451	529.36	923.99	169.943	4.61168	3.29449	0.353421	0	75.4354		Spectrum 51	Rock mica musc-like	88.3525	1.02255	794.039	1847.98	84.9713	4.61168	6.58897	0.353421	0	113.153	2941.07		Spectrum 51	Rock mica musc-like	0.33045	0.00764896	1.97987
2019_09B	Spectrum 52	Rock mica musc-like	3.11121	0.0364651	26.8028	55.0847	8.14034	0.150375	0.591551	0	6.08254	0	1	0	6.75979		11	Spectrum 52	Rock mica musc-like	77.1822	1.17667	525.751	916.703	172.831	2.68144	12.3497	0	0	84.6561		Spectrum 52	Rock mica musc-like	77.1822	0.588336	788.627	1833.41	86.4155	2.68144	24.6994	0	0	126.984	2940.58		Spectrum 52	Rock mica musc-like	0.288719	0.00440164	1.96671
2019_09B	Spectrum 53	Rock mica musc-like	3.3146	0.17618	26.6541	55.29	7.92217	0.101999	0.18879	0.0200524	6.33205	0	1	0	7.03708		11	Spectrum 53	Rock mica musc-like	82.2277	5.68505	522.835	920.12	168.199	1.81882	3.94134	0.282678	0	88.1287		Spectrum 53	Rock mica musc-like	82.2277	2.84253	784.253	1840.24	84.0995	1.81882	7.88269	0.282678	0	132.193	2935.84		Spectrum 53	Rock mica musc-like	0.308091	0.0213007	1.95896
2019_09B	Spectrum 54	Rock mica musc-like	3.4395	0.177836	26.7679	55.4462	7.87573	0.0912508	0.158886	0.0127137	6.02996	0	1	0	6.70135		11	Spectrum 54	Rock mica musc-like	85.3262	5.73851	525.067	922.719	167.213	1.62715	3.31704	0.179225	0	83.9242		Spectrum 54	Rock mica musc-like	85.3262	2.86925	787.601	1845.44	83.6065	1.62715	6.63408	0.179225	0	125.886	2939.17		Spectrum 54	Rock mica musc-like	0.319338	0.0214767	1.96509
2019_09B	Spectrum 55	Rock mica musc-like	3.4395	0.0775194	26.3217	55.312	9.02184	0.173177	0.244494	0	5.40976	0	1	0	6.0121		11	Spectrum 55	Rock mica musc-like	85.3262	2.50143	516.313	920.487	191.547	3.08804	5.10425	0	0	75.2924		Spectrum 55	Rock mica musc-like	85.3262	1.25072	774.47	1840.97	95.7733	3.08804	10.2085	0	0	112.939	2924.03		Spectrum 55	Rock mica musc-like	0.320991	0.00941022	1.94234
2019_09B	Spectrum 56	Rock mica musc-like	3.17976	0.075246	24.6145	58.9031	7.55624	0.0834523	0.262188	0	5.32548	0	1	0	5.91843		11	Spectrum 56	Rock mica musc-like	78.8826	2.42807	482.826	980.249	160.43	1.48809	5.47366	0	0	74.1194		Spectrum 56	Rock mica musc-like	78.8826	1.21404	724.24	1960.5	80.2149	1.48809	10.9473	0	0	111.179	2968.66		Spectrum 56	Rock mica musc-like	0.292289	0.00899692	1.78905
2019_09B	Spectrum 57	Rock mica musc-like	3.70814	0.138619	26.7399	55.7661	10.3505	0.032019	0.307146	0	2.95752	0	1	0	3.28682		11	Spectrum 57	Rock mica musc-like	91.9907	4.47303	524.518	928.043	219.756	0.570953	6.41222	0	0	41.1624		Spectrum 57	Rock mica musc-like	91.9907	2.23651	786.777	1856.09	109.878	0.570953	12.8244	0	0	61.7437	2922.11		Spectrum 57	Rock mica musc-like	0.34629	0.0168383	1.9745
2019_09B	Spectrum 58	Rock mica musc-like	3.53614	0.0742089	27.7474	55.9882	10.1084	0.0711513	0.258245	0.0728785	2.14344	0	1	0	2.3821		11	Spectrum 58	Rock mica musc-like	87.7236	2.39461	544.28	931.738	214.615	1.26875	5.39135	1.02736	0	29.8322		Spectrum 58	Rock mica musc-like	87.7236	1.1973	816.42	1863.48	107.308	1.26875	10.7827	1.02736	0	44.7483	2933.95		Spectrum 58	Rock mica musc-like	0.328894	0.00897789	2.04062
2019_09B	Spectrum 59	Rock mica musc-like	3.79871	0.102206	28.4761	53.9448	10.8358	0.0143098	0.20751	0.100182	2.52029	0	1	0	2.80091		11	Spectrum 59	Rock mica musc-like	94.2374	3.29803	558.575	897.734	230.06	0.255168	4.33216	1.41226	0	35.0771		Spectrum 59	Rock mica musc-like	94.2374	1.64901	837.862	1795.47	115.03	0.255168	8.66431	1.41226	0	52.6156	2907.19		Spectrum 59	Rock mica musc-like	0.356568	0.0124788	2.11349
2019_09B	Spectrum 60	Rock mica musc-like	3.95325	0.0591842	28.094	54.2278	10.5416	0.0398204	0.272304	0	2.81207	0	1	0	3.12518		11	Spectrum 60	Rock mica musc-like	98.0711	1.90978	551.078	902.444	223.812	0.710064	5.68485	0	0	39.1381		Spectrum 60	Rock mica musc-like	98.0711	0.954892	826.618	1804.89	111.906	0.710064	11.3697	0	0	58.7072	2913.22		Spectrum 60	Rock mica musc-like	0.370305	0.00721113	2.08081
2019_09B	Spectrum 61	Rock mica musc-like	3.88837	0.12786	27.5904	55.0439	10.5602	0.0523469	0.163493	0	2.57347	0	1	0	2.86001		11	Spectrum 61	Rock mica musc-like	96.4617	4.12585	541.2	916.024	224.208	0.933433	3.41322	0	0	35.8173		Spectrum 61	Rock mica musc-like	96.4617	2.06292	811.8	1832.05	112.104	0.933433	6.82644	0	0	53.7259	2915.96		Spectrum 61	Rock mica musc-like	0.363886	0.0155641	2.04159
2019_09B	Spectrum 62	Rock mica musc-like	4.55031	0.0937696	27.9056	54.3461	9.70703	0.0765622	0.274084	0.0789696	2.96763	0	1	0	3.29806		11	Spectrum 62	Rock mica musc-like	112.883	3.0258	547.382	904.411	206.094	1.36523	5.72201	1.11323	0	41.3031		Spectrum 62	Rock mica musc-like	112.883	1.5129	821.074	1808.82	103.047	1.36523	11.444	1.11323	0	61.9547	2923.22		Spectrum 62	Rock mica musc-like	0.424776	0.011386	2.05979
2019_09B	Spectrum 63	Rock mica musc-like	4.08227	0.07254	27.7986	55.1025	10.1664	0.0969405	0.144585	0	2.53615	0	1	0	2.81853		11	Spectrum 63	Rock mica musc-like	101.272	2.34076	545.285	916.999	215.847	1.72861	3.01847	0	0	35.2978		Spectrum 63	Rock mica musc-like	101.272	1.17038	817.928	1834	107.924	1.72861	6.03694	0	0	52.9467	2923		Spectrum 63	Rock mica musc-like	0.381112	0.00880886	2.05205
2019_09B	Spectrum 64	Rock mica musc-like	3.78538	0.0708021	27.9991	55.7277	9.83682	0.0841959	0.11817	0.116679	2.26118	0	1	0	2.51294		11	Spectrum 64	Rock mica musc-like	93.9066	2.28468	549.217	927.404	208.85	1.50135	2.46701	1.64482	0	31.4708		Spectrum 64	Rock mica musc-like	93.9066	1.14234	823.825	1854.81	104.425	1.50135	4.93402	1.64482	0	47.2062	2933.39		Spectrum 64	Rock mica musc-like	0.352143	0.00856736	2.05952
2019_09B	Spectrum 65	Rock mica musc-like	3.11862	0.0514829	29.8007	56.0823	8.28111	0.138683	0.22202	0.0370694	2.26798	0	1	0	2.5205		11	Spectrum 65	Rock mica musc-like	77.3658	1.66127	584.558	933.305	175.82	2.47295	4.63507	0.522565	0	31.5655		Spectrum 65	Rock mica musc-like	77.3658	0.830637	876.836	1866.61	87.9099	2.47295	9.27013	0.522565	0	47.3482	2969.17		Spectrum 65	Rock mica musc-like	0.286621	0.0061546	2.16564
2019_09B	Spectrum 66	Rock mica musc-like	4.07207	0.0332882	28.4557	53.9406	10.6171	0.0531953	0.237886	0.00961214	2.58064	0	1	0	2.86797		11	Spectrum 66	Rock mica musc-like	101.019	1.07416	558.173	897.663	225.415	0.948562	4.96631	0.135502	0	35.917		Spectrum 66	Rock mica musc-like	101.019	0.53708	837.259	1795.33	112.708	0.948562	9.93262	0.135502	0	53.8755	2911.74		Spectrum 66	Rock mica musc-like	0.38163	0.00405797	2.10867
2019_09B	Spectrum 67	Rock mica musc-like	3.63694	0.0640034	25.2399	58.7253	9.49603	0.0554542	0.203192	0.0388268	2.54032	0	1	0	2.82317		11	Spectrum 67	Rock mica musc-like	90.2243	2.06529	495.095	977.289	201.614	0.988841	4.242	0.547339	0	35.3559		Spectrum 67	Rock mica musc-like	90.2243	1.03265	742.642	1954.58	100.807	0.988841	8.484	0.547339	0	53.0339	2952.34		Spectrum 67	Rock mica musc-like	0.336163	0.00769499	1.84465
2019_09B	Spectrum 68	Rock mica musc-like	3.59585	0.0322182	25.7655	57.9071	9.62331	0.0642402	0.271183	0.0351058	2.70555	0	1	0	3.00679		11	Spectrum 68	Rock mica musc-like	89.2048	1.03963	505.404	963.672	204.317	1.14551	5.66145	0.494884	0	37.6555		Spectrum 68	Rock mica musc-like	89.2048	0.519816	758.105	1927.34	102.158	1.14551	11.3229	0.494884	0	56.4832	2946.78		Spectrum 68	Rock mica musc-like	0.332992	0.00388083	1.88662
2019_09B	Spectrum 69	Rock mica musc-like	3.99832	0.117621	28.238	54.1436	10.3474	0.0621233	0.25988	0.0866699	2.74639	0	1	0	3.05218		11	Spectrum 69	Rock mica musc-like	99.1893	3.79544	553.903	901.042	219.691	1.10776	5.42547	1.22178	0	38.2239		Spectrum 69	Rock mica musc-like	99.1893	1.89772	830.854	1802.08	109.845	1.10776	10.8509	1.22178	0	57.3359	2914.39		Spectrum 69	Rock mica musc-like	0.374378	0.0143254	2.09064
2019_09B	Spectrum 70	Rock mica musc-like	3.59201	0.0574739	25.5692	59.5942	8.34448	0.112052	0.124549	0.0696273	2.53647	0	1	0	2.81888		11	Spectrum 70	Rock mica musc-like	89.1096	1.8546	501.553	991.749	177.165	1.99807	2.60019	0.981532	0	35.3022		Spectrum 70	Rock mica musc-like	89.1096	0.927298	752.33	1983.5	88.5826	1.99807	5.20037	0.981532	0	52.9534	2975.58		Spectrum 70	Rock mica musc-like	0.329417	0.00685599	1.85412
2019_09B	Spectrum 20	Rock Mg-rich	16.9459	0.0588662	20.5759	38.628	0.60963	1.38536	0.75134	0.0869075	20.9582	1	0	20.9582	0		25	Spectrum 20	Rock Mg-rich	420.388	1.89952	403.607	642.835	12.9433	24.7033	15.6856	1.22513	291.694	0		Spectrum 20	Rock Mg-rich	420.388	0.949761	605.41	1285.67	6.47165	24.7033	31.3712	1.22513	291.694	0	2667.88		Spectrum 20	Rock Mg-rich	3.93934	0.0177999	3.78209
2019_09B	Spectrum 21	Rock Mg-rich	17.13	0.102838	20.7787	37.7831	0.756786	1.24184	0.611224	0.0774619	21.5179	1	0	21.5179	0		25	Spectrum 21	Rock Mg-rich	424.958	3.31843	407.586	628.775	16.0676	22.1441	12.7604	1.09198	299.484	0		Spectrum 21	Rock Mg-rich	424.958	1.65921	611.379	1257.55	8.03382	22.1441	25.5208	1.09198	299.484	0	2651.82		Spectrum 21	Rock Mg-rich	4.00628	0.0312844	3.84251
2019_09B	Spectrum 22	Rock Mg-rich	17.9379	0.0691556	20.9724	37.8016	0.532245	1.11065	0.620663	0.162487	20.7928	1	0	20.7928	0		25	Spectrum 22	Rock Mg-rich	445	2.23155	411.385	629.084	11.3003	19.8048	12.9575	2.29058	289.392	0		Spectrum 22	Rock Mg-rich	445	1.11577	617.077	1258.17	5.65016	19.8048	25.9149	2.29058	289.392	0	2664.41		Spectrum 22	Rock Mg-rich	4.1754	0.0209384	3.85999
2019_09B	Spectrum 23	Rock Mg-rich	17.9656	0.0818515	21.1427	37.7913	0.512087	1.06019	0.751145	0.0807651	20.6143	1	0	20.6143	0		25	Spectrum 23	Rock Mg-rich	445.687	2.64122	414.726	628.911	10.8723	18.905	15.6815	1.13854	286.908	0		Spectrum 23	Rock Mg-rich	445.687	1.32061	622.089	1257.82	5.43617	18.905	31.363	1.13854	286.908	0	2670.67		Spectrum 23	Rock Mg-rich	4.17205	0.0247243	3.88223
2019_09B	Spectrum 25	Rock Mg-rich	16.3522	0.11486	20.4759	39.5185	0.99433	1.11138	0.946083	0.0558028	20.431	1	0	20.431	0		25	Spectrum 25	Rock Mg-rich	405.661	3.70637	401.646	657.655	21.111	19.8178	19.7512	0.786648	284.356	0		Spectrum 25	Rock Mg-rich	405.661	1.85318	602.469	1315.31	10.5555	19.8178	39.5024	0.786648	284.356	0	2680.31		Spectrum 25	Rock Mg-rich	3.78371	0.0345703	3.74626
2019_09B	Spectrum 26	Rock Mg-rich	17.5747	0.167843	20.7323	37.7854	0.626518	1.0237	1.80706	0.0272407	20.2552	1	0	20.2552	0		25	Spectrum 26	Rock Mg-rich	435.989	5.41604	406.676	628.814	13.3019	18.2543	37.7257	0.384011	281.909	0		Spectrum 26	Rock Mg-rich	435.989	2.70802	610.014	1257.63	6.65094	18.2543	75.4514	0.384011	281.909	0	2688.99		Spectrum 26	Rock Mg-rich	4.05346	0.0503539	3.78094
2019_09B	Spectrum 27	Rock Mg-rich	17.1889	0.0644831	21.1499	38.0823	0.56905	1.09747	0.693778	0.0907841	21.0633	1	0	21.0633	0		25	Spectrum 27	Rock Mg-rich	426.418	2.08077	414.867	633.754	12.0817	19.5697	14.4839	1.27978	293.157	0		Spectrum 27	Rock Mg-rich	426.418	1.04039	622.3	1267.51	6.04087	19.5697	28.9677	1.27978	293.157	0	2666.28		Spectrum 27	Rock Mg-rich	3.99825	0.01951	3.88994
2019_09B	Spectrum 28	Rock Mg-rich	17.4559	0.11281	20.8974	38.2666	0.723435	1.05177	0.924987	0.10575	20.4614	1	0	20.4614	0		25	Spectrum 28	Rock Mg-rich	433.042	3.64019	409.914	636.821	15.3595	18.7548	19.3108	1.49075	284.779	0		Spectrum 28	Rock Mg-rich	433.042	1.8201	614.87	1273.64	7.67977	18.7548	38.6216	1.49075	284.779	0	2674.7		Spectrum 28	Rock Mg-rich	4.04758	0.0340243	3.8314
2019_09B	Spectrum 29	Rock Mg-rich	17.0038	0.117529	21.016	37.6703	0.875788	1.10185	0.871127	0.0983684	21.2453	1	0	21.2453	0		25	Spectrum 29	Rock Mg-rich	421.826	3.79247	412.24	626.897	18.5942	19.6478	18.1864	1.38669	295.689	0		Spectrum 29	Rock Mg-rich	421.826	1.89623	618.36	1253.79	9.29712	19.6478	36.3728	1.38669	295.689	0	2658.27		Spectrum 29	Rock Mg-rich	3.96711	0.0356667	3.87696
2019_09B	Spectrum 30	Rock Mg-rich	17.2135	0.143909	20.8778	38.0406	0.532644	1.23879	1.10183	0	20.8509	1	0	20.8509	0		25	Spectrum 30	Rock Mg-rich	427.028	4.64372	409.529	633.06	11.3088	22.0897	23.0027	0	290.201	0		Spectrum 30	Rock Mg-rich	427.028	2.32186	614.294	1266.12	5.65439	22.0897	46.0055	0	290.201	0	2673.72		Spectrum 30	Rock Mg-rich	3.99284	0.0434201	3.82922
2019_09B	Spectrum 31	Rock Mg-rich	18.0513	0.111541	21.1237	38.3264	0.433498	1.11771	0.403003	0.130775	20.3021	1	0	20.3021	0		25	Spectrum 31	Rock Mg-rich	447.812	3.59926	414.352	637.816	9.20377	19.9306	8.41342	1.84353	282.563	0		Spectrum 31	Rock Mg-rich	447.812	1.79963	621.529	1275.63	4.60189	19.9306	16.8268	1.84353	282.563	0	2672.54		Spectrum 31	Rock Mg-rich	4.18901	0.0336689	3.87602
2019_09B	Spectrum 32	Rock Mg-rich	17.6819	0.101627	21.2045	38.1823	0.541732	1.09259	0.454405	0	20.741	1	0	20.741	0		25	Spectrum 32	Rock Mg-rich	438.647	3.27936	415.938	635.419	11.5017	19.4828	9.48654	0	288.67	0		Spectrum 32	Rock Mg-rich	438.647	1.63968	623.908	1270.84	5.75087	19.4828	18.9731	0	288.67	0	2667.91		Spectrum 32	Rock Mg-rich	4.1104	0.0307297	3.89761
2019_09B	Spectrum 36	Rock Mg-rich	17.1321	0.0753664	20.905	37.7277	0.57095	1.05851	0.473395	0.171236	21.8857	1	0	21.8857	0		25	Spectrum 36	Rock Mg-rich	425.008	2.43196	410.064	627.853	12.1221	18.8751	9.88299	2.41391	304.603	0		Spectrum 36	Rock Mg-rich	425.008	1.21598	615.095	1255.71	6.06104	18.8751	19.766	2.41391	304.603	0	2648.74		Spectrum 36	Rock Mg-rich	4.01141	0.0229539	3.87036
2019_09B	Spectrum 37	Rock Mg-rich	17.3021	0.101386	21.1977	37.8013	0.615684	1.13022	0.475022	0.141605	21.235	1	0	21.235	0		25	Spectrum 37	Rock Mg-rich	429.225	3.27157	415.804	629.079	13.0719	20.1538	9.91695	1.9962	295.546	0		Spectrum 37	Rock Mg-rich	429.225	1.63578	623.706	1258.16	6.53593	20.1538	19.8339	1.9962	295.546	0	2656.79		Spectrum 37	Rock Mg-rich	4.03895	0.030785	3.91265
2019_09B	Spectrum 38	Rock Mg-rich	16.758	0.0548586	20.7497	40.0892	0.644515	1.15157	0.671122	0.0847416	19.7963	1	0	19.7963	0		25	Spectrum 38	Rock Mg-rich	415.728	1.7702	407.016	667.153	13.684	20.5344	14.0109	1.1946	275.523	0		Spectrum 38	Rock Mg-rich	415.728	0.885102	610.525	1334.31	6.84199	20.5344	28.0218	1.1946	275.523	0	2693.56		Spectrum 38	Rock Mg-rich	3.85854	0.01643	3.77768
2019_09B	Spectrum 39	Rock Mg-rich	16.9943	0.103854	21.6357	38.8001	0.535799	1.3344	0.431495	0.0124975	20.1519	1	0	20.1519	0		25	Spectrum 39	Rock Mg-rich	421.59	3.35122	424.395	645.7	11.3758	23.7946	9.00825	0.176176	280.472	0		Spectrum 39	Rock Mg-rich	421.59	1.67561	636.593	1291.4	5.68789	23.7946	18.0165	0.176176	280.472	0	2679.41		Spectrum 39	Rock Mg-rich	3.93362	0.0312683	3.95979
2019_09B	Spectrum 40	Rock Mg-rich	17.0763	0.0553473	22.6571	37.4023	0.588935	1.05483	0.422109	0.0966894	20.6463	1	0	20.6463	0		25	Spectrum 40	Rock Mg-rich	423.626	1.78597	444.432	622.438	12.5039	18.8093	8.81231	1.36302	287.353	0		Spectrum 40	Rock Mg-rich	423.626	0.892987	666.648	1244.88	6.25196	18.8093	17.6246	1.36302	287.353	0	2667.44		Spectrum 40	Rock Mg-rich	3.97033	0.0167386	4.16533
2019_09B	Spectrum 41	Rock Mg-rich	16.8583	0.138735	20.6788	39.0476	0.547055	1.23031	0.506924	0	20.9921	1	0	20.9921	0		25	Spectrum 41	Rock Mg-rich	418.218	4.47675	405.627	649.819	11.6148	21.9385	10.583	0	292.166	0		Spectrum 41	Rock Mg-rich	418.218	2.23838	608.44	1299.64	5.80738	21.9385	21.1659	0	292.166	0	2669.61		Spectrum 41	Rock Mg-rich	3.91646	0.0419232	3.79855
2019_07B	vend_bloc2_mica1	Rock mica	0.806615	1.25058	35.9895	49.9494	8.48089	0.0320021	0.278494	0	3.20982	0	1	0	3.56721		11	vend_bloc2_mica1	Rock mica	20.0103	40.3544	705.954	831.243	180.061	0.570652	5.81407	0	0	44.6738		vend_bloc2_mica1	Rock mica	20.0103	20.1772	1058.93	1662.49	90.0307	0.570652	11.6281	0	0	67.0108	2930.84		vend_bloc2_mica1	Rock mica	0.0751023	0.151457	2.64957
2019_09	Mica3	Rock mica	0.153719	0.115245	43.8383	54.3186	0.827193	0.262706	0.129017	0	0.355159	0	1	0	0.394704		11	Mica3	Rock mica	3.81341	3.71878	859.912	903.954	17.5625	4.68448	2.69347	0	0	4.94307		Mica3	Rock mica	3.81341	1.85939	1289.87	1807.91	8.78125	4.68448	5.38695	0	0	7.4146	3129.72		Mica3	Rock mica	0.013403	0.0130704	3.02233
2019_09	Mica5	Rock mica	1.7917	0.249751	32.7154	51.9585	9.10345	0.0595045	0.456095	0	3.66556	0	1	0	4.07369		11	Mica5	Rock mica	44.4481	8.05909	641.73	864.678	193.279	1.06106	9.52181	0	0	51.0168		Mica5	Rock mica	44.4481	4.02954	962.596	1729.36	96.6396	1.06106	19.0436	0	0	76.5253	2933.7		Mica5	Rock mica	0.16666	0.0302178	2.40619
2019_09	Mica8	Rock mica	0.741329	0.150074	38.8842	54.9356	3.18	0.17022	0.0227834	0	1.85001	0	1	0	2.05599		11	Mica8	Rock mica	18.3907	4.84265	762.735	914.221	67.5158	3.0353	0.475645	0	0	25.7482		Mica8	Rock mica	18.3907	2.42132	1144.1	1828.44	33.7579	3.0353	0.951291	0	0	38.6223	3069.72		Mica8	Rock mica	0.0659009	0.0173531	2.73317
2019_09	Mica9	Rock mica	0.404732	0.170691	41.3727	55.7903	0.920545	0.268978	0.0256956	0.0184531	1.02793	0	1	0	1.14239		11	Mica9	Rock mica	10.0405	5.50793	811.548	928.445	19.5445	4.79633	0.536442	0.260132	0	14.3067		Mica9	Rock mica	10.0405	2.75396	1217.32	1856.89	9.77224	4.79633	1.07288	0.260132	0	21.46	3124.37		Mica9	Rock mica	0.0353497	0.0193918	2.85723
2019_09	Mica10	Rock mica	0.669772	0.100789	38.6868	56.0205	2.26547	0.581278	0.092228	0.0152186	1.56798	0	1	0	1.74256		11	Mica10	Rock mica	16.6155	3.25231	758.862	932.276	48.0991	10.3651	1.92543	0.214536	0	21.8229		Mica10	Rock mica	16.6155	1.62616	1138.29	1864.55	24.0495	10.3651	3.85086	0.214536	0	32.7344	3092.3		Mica10	Rock mica	0.0591051	0.0115692	2.69944
2019_09	Mica11	Rock mica	0.350533	0.303872	39.6237	51.0803	7.34671	0.129519	0.0270378	0.034881	1.05401	0	1	0	1.17136		11	Mica11	Rock mica	8.69592	9.80549	777.241	850.063	155.981	2.30954	0.564463	0.491715	0	14.6695		Mica11	Rock mica	8.69592	4.90275	1165.86	1700.13	77.9905	2.30954	1.12893	0.491715	0	22.0043	2983.51		Mica11	Rock mica	0.0320613	0.0361522	2.86563
2019_09	Mica12	Rock mica	0.320972	0.15865	41.9364	56.0054	0.175286	0.593211	0.028831	0	0.78124	0	1	0	0.868225		11	Mica12	Rock mica	7.96259	5.11941	822.605	932.026	3.72158	10.5779	0.6019	0	0	10.8732		Mica12	Rock mica	7.96259	2.5597	1233.91	1864.05	1.86079	10.5779	1.2038	0	0	16.3098	3138.43		Mica12	Rock mica	0.0279083	0.0179432	2.88318
2019_09	Mica13	Rock mica	0.273736	0.509851	41.3509	53.763	2.69317	0.257237	0.26802	0.0322226	0.826997	0	1	0	0.919078		11	Mica13	Rock mica	6.79076	16.4521	811.12	894.707	57.1799	4.58697	5.59541	0.45424	0	11.5101		Mica13	Rock mica	6.79076	8.22605	1216.68	1789.41	28.5899	4.58697	11.1908	0.45424	0	17.2651	3083.2		Mica13	Rock mica	0.0242276	0.0586966	2.89385
2019_09	Mica15	Rock mica	0.293677	0.172898	41.1722	54.013	2.74001	0.30236	0.0638626	0	1.21809	0	1	0	1.35372		11	Mica15	Rock mica	7.28546	5.57915	807.615	898.868	58.1743	5.39159	1.33325	0	0	16.9532		Mica15	Rock mica	7.28546	2.78957	1211.42	1797.74	29.0871	5.39159	2.6665	0	0	25.4298	3081.81		Mica15	Rock mica	0.0260042	0.0199138	2.88265
2019_09	Mica17	Rock mica	0.179277	0.340668	41.7955	53.3161	2.97355	0.346372	0.160115	0.107522	0.780946	0	1	0	0.867899		11	Mica17	Rock mica	4.44745	10.9928	819.841	887.27	63.1326	6.17639	3.34269	1.51573	0	10.8691		Mica17	Rock mica	4.44745	5.49642	1229.76	1774.54	31.5663	6.17639	6.68538	1.51573	0	16.3037	3076.49		Mica17	Rock mica	0.0159019	0.0393049	2.93134
2019_09	Mica20	Rock mica	2.12118	0.310339	32.0014	53.4511	8.83681	0.109371	0.301358	0.00428058	2.84295	0	1	0	3.1595		11	Mica20	Rock mica	52.6217	10.0142	627.725	889.518	187.618	1.95027	6.2914	0.0603431	0	39.5679		Mica20	Rock mica	52.6217	5.00709	941.587	1779.04	93.809	1.95027	12.5828	0.0603431	0	59.3518	2946.01		Mica20	Rock mica	0.196482	0.0373916	2.34384
																																												Al IV	Al VI		Mg	Na	Al
																																												2	0	Kaolinite	0	0	2
																																												0.5	0	Saponite	3	0	0.5
																																												1	4.7	Tosudite	2.3	0	5.7
																																												1	3	Sudoite	2	0	4
																																												1	2	Muscovite	0	0	3
																																												1	0	Biotite	3	0	1
																																												0.3	2	Bedellite	0	0.3	2.3
																																												0	1.7	Mont L.C.	0.3	0.3	1.7
																																												0	1.4	Mont H.C.	0.6	0.6	1.4
																																												0.7	1.9	Illite	0.1	0	2.6
																																												1	1	Clinochlore	5	0	2
																																												1	1	Chamosite	0	0	2
																																												2	2	Amesite	2	0	4
																																												0	1	Celadonite	0	0	1
																																												0	0	Al-free chlorite	6	0	0
																																												1.64	1.14	Corrensite	6.12	0.15	1.64
																																												1.37	1.12	Ripidolite	2.95	0	2.49
																																															Mg	Na	Al
[truncated: 99 more columns]

## Sheet: Ternary plots
	Triangle
	% calculated		Cordonations
	Fe	AlIV	X	Y
	0	0	0	0
	0	0.2	0.1	0.173205
	0	0.4	0.2	0.34641
	0	0.6	0.3	0.519615
	0	0.8	0.4	0.69282
	0	1	0.5	0.866025
	1	0	1	0
	1	0.2	0.9	0.173205
	1	0.4	0.8	0.34641
	1	0.6	0.7	0.519615
	1	0.8	0.6	0.69282
	1	1	0.5	0.866025

## Sheet: Binary plots
		Mg	Na	Al	Si	K	Ca	Ti	Mn	Fe2+	Fe3+	Fe+Mg	(Fe/Fe+Mg)	Si+Al	(Si/Si+Al)		T+O	Al (Tetra)	Al (octa)
	Fossil	3.99994	0.0428507	4.11549	5.75103	0.141376	0.143484	0.000757859	0.0118624	3.07579	0	7.07574	0.434696	9.86652	0.582883	25	16.9541	2.24897	1.86652
	Fossil	3.8252	0.0401304	4.18587	5.79448	0.15145	0.125812	0.00913669	0.013513	3.05365	0	6.87885	0.443919	9.98035	0.580589	25	16.8727	2.20552	1.98035
	Fossil	3.04885	0.0509321	4.1107	6.11428	0.15472	0.158142	0.00953391	0.0078239	3.26869	0	6.31754	0.517399	10.225	0.597975	25	16.5503	1.88572	2.22498
	Fossil	3.58129	0.0270755	4.10687	5.92687	0.0281087	0.132076	0	0.0139841	3.23101	0	6.8123	0.474291	10.0337	0.590694	25	16.86	2.07313	2.03374
	Fossil	3.61547	0.155277	4.25268	5.54488	0.0228213	0.173351	0.00335221	0.0170613	3.62958	0	7.24505	0.500974	9.79756	0.565945	25	17.0597	2.45512	1.79756
	Fossil	3.50506	0	4.04911	5.63865	0.036026	0.146071	0.014768	0.0366054	3.91374	0	7.4188	0.527543	9.68776	0.582038	25	17.1432	2.36135	1.68776
	Fossil	3.21104	0	3.90375	5.60332	0.0317125	0.151642	0.0116272	0.0262984	4.50964	0	7.72068	0.584099	9.50707	0.589384	25	17.2541	2.39668	1.50707
	Fossil	3.57088	0	4.10518	5.56231	0.014195	0.144207	0.00174923	0.0104071	3.98153	0	7.55241	0.527187	9.66748	0.575362	25	17.2303	2.43769	1.66748
	Fossil	3.38314	0	3.94589	5.79855	0.0221736	0.220043	0.010755	0.0200151	3.82828	0	7.21142	0.530864	9.74444	0.595062	25	16.9759	2.20145	1.74444
	Fossil	3.16172	0	3.80711	5.77382	0.0235992	0.193509	0.0244213	0.0311708	4.29465	0	7.45637	0.57597	9.58093	0.602636	25	17.0685	2.22618	1.58093
	Fossil	3.08454	0	4.09992	6.23893	0.0235249	0.165997	0.0111557	0.0265479	3.06111	0	6.14565	0.498094	10.3388	0.603445	25	16.511	1.76107	2.33885
	Fossil	3.21646	0	3.8367	5.48438	0.0284596	0.119151	0.00903526	0.0294013	4.87889	0	8.09535	0.602679	9.32107	0.588385	25	17.4458	2.51562	1.32107
	Fossil	3.28867	0	3.96844	5.69328	0.0161937	0.116817	0.014021	0.0296058	4.18954	0	7.47821	0.560233	9.66172	0.589262	25	17.1695	2.30672	1.66172
	Fossil	3.24334	0.0033855	3.95874	5.64257	0.00501954	0.125279	0.0150004	0.0315656	4.34237	0	7.58571	0.572441	9.60131	0.587687	25	17.2186	2.35743	1.60131
	Fossil	3.48733	0	4.08013	5.52079	0.00918151	0.0901006	0.0102509	0.0282764	4.20743	0	7.69476	0.546791	9.60092	0.575027	25	17.324	2.47921	1.60092
	Fossil	3.08005	0.00158421	4.02646	5.85299	0.0160105	0.10459	0	0.0287393	4.03217	0	7.11222	0.566936	9.87944	0.592441	25	17.0204	2.14701	1.87944
	Fossil	2.75253	0	4.19738	6.28802	0.0186039	0.160702	0.0151351	0.0138925	3.1612	0	5.91374	0.534552	10.4854	0.599693	25	16.413	1.71198	2.48539
	Fossil	3.43246	0	3.95559	5.5939	0.00533925	0.0960745	0.0109435	0.0180669	4.30765	0	7.74012	0.556536	9.54949	0.58578	25	17.3077	2.4061	1.54949
	Fossil	2.88411	0.00307575	4.1685	6.03771	0.013085	0.13217	0.0150547	0.00366099	3.6137	0	6.49781	0.556142	10.2062	0.591572	25	16.7077	1.96229	2.20621
	Fossil	3.4033	0	3.98883	5.73069	0.02292	0.107771	0.0164675	0.0364463	3.96346	0	7.36676	0.53802	9.71952	0.589607	25	17.1227	2.26931	1.71952
	Fossil	2.93589	0.00168416	4.19413	6.22273	0.00539361	0.137745	0.00755051	0.0198353	3.15124	0	6.08713	0.517689	10.4169	0.597371	25	16.5238	1.77727	2.41686
	Fossil	3.6873	0.0756608	4.19421	5.75228	0.129502	0.160027	0.00717573	0.0114856	3.22837	0	6.91567	0.466819	9.94649	0.578323	25	16.8737	2.24772	1.94649
	Fossil	3.77258	0.01584	4.23478	5.62701	0.0801402	0.157356	0.00183697	0.0175735	3.39462	0	7.16721	0.473633	9.8618	0.570587	25	17.0466	2.37299	1.8618
	Fossil	3.56898	0.026693	4.19292	5.92584	0.0371523	0.219748	0	0.0105562	3.02773	0	6.59671	0.458975	10.1188	0.585629	25	16.726	2.07416	2.11876
	Fossil	3.29491	0.0158935	4.0528	6.09489	0.0674433	0.185286	0.0133828	0.0162621	3.16612	0	6.46103	0.490034	10.1477	0.600619	25	16.625	1.90511	2.14769
	Fossil	3.72181	0.0475999	4.16604	5.5226	0.0328674	0.174837	0.00900554	0.0271463	3.72371	0	7.44552	0.500128	9.68864	0.570007	25	17.1613	2.4774	1.68864
	Fossil	3.21655	0.0340229	3.85677	6.27924	0.0319989	0.255767	0.00855578	0.00911905	3.1248	0	6.34135	0.492766	10.136	0.619498	25	16.4865	1.72076	2.13601
	Fossil	3.81881	0.0153841	4.19355	5.77699	0.0702815	0.154677	0	0.0170429	3.12234	0	6.94114	0.44983	9.97054	0.579406	25	16.9287	2.22301	1.97054
	Fossil Mg-rich	4.07183	0.0199374	4.03719	5.7831	0.0567059	0.178337	0.00920492	0.0177997	3.05332	0	7.12515	0.428527	9.82029	0.588893	25	16.9632	2.2169	1.82029
	Fossil Mg-rich	4.18811	0.038772	4.11457	5.75929	0.0285311	0.152275	0	0.0170242	2.91851	0	7.10662	0.410675	9.87386	0.583286	25	16.9975	2.24071	1.87386
	Fossil Mg-rich	3.79706	0.0552342	4.12205	5.78848	0.0650142	0.144651	0.00320788	0.0193715	3.21235	0	7.00941	0.458291	9.91053	0.584074	25	16.9393	2.21152	1.91053
	Fossil Mg-rich	3.82699	0.0526544	4.12801	5.80653	0.0594727	0.153323	0	0.0174712	3.14108	0	6.96807	0.450782	9.93454	0.584479	25	16.9201	2.19347	1.93454
	Fossil Mg-rich	3.75431	0.0540571	4.21003	5.9406	0.0531855	0.166226	0.00679719	0.0104499	2.80556	0	6.55987	0.427686	10.1506	0.585244	25	16.7209	2.0594	2.15063
	Fossil Mg-rich	3.98074	0.0373271	4.15354	5.74087	0.0589454	0.156754	0.00119355	0.0147643	3.08516	0	7.0659	0.436626	9.89442	0.580214	25	16.9751	2.25913	1.89442
	Fossil Mg-rich	3.93199	0.0466924	4.08415	5.81714	0.067374	0.169614	0.00753382	0.0234246	3.04236	0	6.97435	0.436221	9.90129	0.587513	25	16.8991	2.18286	1.90129
	Fossil Mg-rich	3.86912	0.0341501	4.13421	5.79884	0.0857355	0.137541	0.00891126	0.0142695	3.10231	0	6.97143	0.445003	9.93305	0.583792	25	16.9187	2.20116	1.93305
	Fossil Mg-rich	3.83908	0.0317101	4.1562	5.81337	0.0632279	0.153865	0.0160172	0.0191911	3.04731	0	6.8864	0.442512	9.96957	0.583111	25	16.8752	2.18663	1.96957
	Fossil Mg-rich	3.86107	0.056773	4.18906	5.83308	0.056883	0.144525	0.0081701	0.0087128	2.96276	0	6.82383	0.434178	10.0221	0.582019	25	16.8547	2.16692	2.02215
	Fossil Mg-rich	3.68327	0.0559268	4.37804	5.81537	0.0640734	0.13006	0.0111218	0.0144392	2.89219	0	6.57546	0.439846	10.1934	0.570503	25	16.7833	2.18463	2.19341
	Fossil Mg-rich	3.92386	0.044461	4.153	5.78541	0.069819	0.15054	0.00979828	0.00906262	3.03947	0	6.96333	0.436497	9.93841	0.582127	25	16.9108	2.21459	1.93841
	Fossil Mg-rich	3.82461	0.0253007	4.25216	5.5687	0.0824315	0.106975	0.0268247	0.0178351	3.42743	0	7.25204	0.472616	9.82086	0.567028	25	17.0907	2.4313	1.82086
	Fossil Mg-rich	3.86533	0.0304355	4.15401	5.72548	0.0795725	0.120945	0.0148373	0.0192359	3.22784	0	7.09317	0.455063	9.87949	0.579532	25	16.9919	2.27452	1.87949
	Fossil Mg-rich	3.91424	0.0442925	4.13062	5.74373	0.0826196	0.143133	0.0064489	0.0216937	3.16118	0	7.07543	0.446783	9.87435	0.581682	25	16.9715	2.25627	1.87435
	Fossil Mg-rich	3.97645	0.0478329	4.06931	5.74675	0.0657787	0.172086	0.0103151	0.00909325	3.16748	0	7.14392	0.443381	9.81606	0.585443	25	16.9691	2.25325	1.81606
	Fossil Mg-rich	3.90092	0.0397692	4.30897	5.52243	0.048365	0.120871	0	0.0182273	3.4076	0	7.30852	0.466251	9.8314	0.561713	25	17.1581	2.47757	1.8314
	Fossil Mg-rich	3.96076	0.0368489	4.16597	5.70519	0.0750711	0.159465	0	0.0111032	3.15338	0	7.11414	0.443255	9.87116	0.577965	25	16.9964	2.29481	1.87116
	Fossil Mg-rich	3.80621	0.034897	4.21773	5.68229	0.0765311	0.132811	0.00836229	0.0153832	3.28198	0	7.0882	0.463021	9.90002	0.573967	25	17.0036	2.31771	1.90002
	Fossil Mg-rich	3.74123	0.0309289	4.1579	5.87946	0.0676856	0.150139	0.00355367	0.0206698	3.03577	0	6.777	0.447952	10.0374	0.585758	25	16.835	2.12054	2.03736
	Fossil Mg-rich	4.08981	0.0443062	4.12431	5.75394	0.0457246	0.157402	0.00482708	0.0140072	2.98977	0	7.07958	0.422309	9.87825	0.582485	25	16.9718	2.24606	1.87825
	Fossil Mg-rich	3.63571	0.0256449	4.23287	5.85795	0.081616	0.141029	0.00260943	0.0145778	3.08463	0	6.72034	0.458999	10.0908	0.580523	25	16.8257	2.14205	2.09082
	Rock Mg-rich clay	3.81312	0.0150779	4.04823	6.1001	0.129185	0.0479099	0.00756395	0.0124182	2.76675	0	6.57987	0.420488	10.1483	0.601094	25	16.7406	1.8999	2.14833
	Rock Mg-rich clay	3.56255	0.0241163	4.03374	6.34361	0.163888	0.0428628	0.00949474	0.0109782	2.53279	0	6.09534	0.415529	10.3774	0.611293	25	16.4837	1.65639	2.37735
	Rock Mg-rich clay	3.85847	0.0314779	4.055	6.10747	0.206203	0.0386692	0.00272636	0.0215071	2.6596	0	6.51808	0.408035	10.1625	0.600983	25	16.7021	1.89253	2.16248
	Rock Mg-rich clay	4.03229	0.0337322	4.00356	6.07476	0.184376	0.0491973	0.00199075	0.0214709	2.62915	0	6.66145	0.394682	10.0783	0.602755	25	16.7612	1.92524	2.07831
	Rock mica	3.51069	0.0179281	3.86155	6.41297	0.346747	0.0840163	0.128794	0.0222408	2.32486	0	5.83554	0.398396	10.2745	0.624163	25	16.1323	1.58703	2.27452
	Rock mica Mg-rich	3.93934	0.0177999	3.78209	6.02383	0.121288	0.231488	0.146985	0.0114803	2.73338	0	6.67272	0.409635	9.80592	0.614306	25	16.4901	1.97617	1.80592
	Rock mica Mg-rich	4.00628	0.0312844	3.84251	5.92777	0.151477	0.208763	0.120299	0.0102946	2.82338	0	6.82966	0.4134	9.77028	0.606714	25	16.6102	2.07223	1.77028
	Rock mica Mg-rich	4.1754	0.0209384	3.85999	5.90265	0.10603	0.185827	0.121579	0.0214923	2.71535	0	6.89075	0.394057	9.76264	0.604616	25	16.6749	2.09735	1.76264
	Rock mica Mg-rich	4.17205	0.0247243	3.88223	5.8872	0.101775	0.176968	0.146794	0.0106578	2.68573	0	6.85778	0.391633	9.76944	0.602614	25	16.6379	2.1128	1.76944
	Rock mica Mg-rich	3.78371	0.0345703	3.74626	6.13413	0.196908	0.184846	0.184225	0.00733729	2.65227	0	6.43598	0.4121	9.88039	0.620839	25	16.3237	1.86587	1.88039
	Rock mica Mg-rich	4.05346	0.0503539	3.78094	5.8462	0.12367	0.169713	0.350743	0.00357021	2.62096	0	6.67442	0.392687	9.62713	0.607262	25	16.3051	2.1538	1.62713
	Rock mica Mg-rich	3.99825	0.01951	3.88994	5.9423	0.113283	0.183492	0.135806	0.0119997	2.74874	0	6.74699	0.407403	9.83224	0.604369	25	16.5912	2.0577	1.83224
	Rock mica Mg-rich	4.04758	0.0340243	3.8314	5.95226	0.143563	0.175298	0.180495	0.0139338	2.66178	0	6.70936	0.396727	9.78366	0.608388	25	16.507	2.04774	1.78366
	Rock mica Mg-rich	3.96711	0.0356667	3.87696	5.89573	0.174872	0.18478	0.171036	0.0130413	2.78084	0	6.74795	0.412101	9.77268	0.603286	25	16.5337	2.10427	1.77268
	Rock mica Mg-rich	3.99284	0.0434201	3.82922	5.9193	0.10574	0.206545	0.215082	0	2.71346	0	6.7063	0.404614	9.74851	0.6072	25	16.4548	2.0807	1.74851
	Rock mica Mg-rich	4.18901	0.0336689	3.87602	5.96639	0.0860958	0.186439	0.0787025	0.0172451	2.6432	0	6.83222	0.386874	9.84241	0.606192	25	16.6919	2.03361	1.84241
	Rock mica Mg-rich	4.1104	0.0307297	3.89761	5.95428	0.107779	0.182566	0.0888949	0	2.70502	0	6.81542	0.396897	9.85189	0.604379	25	16.6673	2.04572	1.85189
	Rock mica Mg-rich	4.01141	0.0229539	3.87036	5.92595	0.114414	0.178151	0.0932799	0.0227835	2.87498	0	6.88639	0.417487	9.79631	0.604917	25	16.7055	2.07405	1.79631
	Rock mica Mg-rich	4.03895	0.030785	3.91265	5.91954	0.123004	0.189644	0.093317	0.0187839	2.78104	0	6.81999	0.407778	9.83219	0.602057	25	16.671	2.08046	1.83219
	Rock mica Mg-rich	3.85854	0.01643	3.77768	6.19211	0.127006	0.190588	0.130041	0.0110875	2.55724	0	6.41577	0.398586	9.9698	0.621087	25	16.3967	1.80789	1.9698
	Rock mica Mg-rich	3.93362	0.0312683	3.95979	6.02466	0.106141	0.222014	0.0840508	0.0016438	2.61692	0	6.55054	0.399497	9.98445	0.603404	25	16.5366	1.97534	1.98445
	Rock mica Mg-rich	3.97033	0.0167386	4.16533	5.83365	0.11719	0.176286	0.0825913	0.0127746	2.69315	0	6.66348	0.404165	9.99899	0.583424	25	16.6752	2.16635	1.99899
	Rock mica Mg-rich	3.91646	0.0419232	3.79855	6.08533	0.108768	0.205446	0.0991059	0	2.73603	0	6.6525	0.411279	9.88389	0.615682	25	16.5364	1.91467	1.88389
